1 **Single cell analyses reveal distinct adaptation of typhoidal and non-**  
2 **typhoidal *Salmonella enterica* serovars to intracellular lifestyle**

3

4 Tatjana Reuter<sup>1</sup>, Felix Scharte<sup>1</sup>, Rico Franzkoch<sup>1,2</sup>, Viktoria Liss<sup>1,2</sup> and Michael Hensel<sup>1,3</sup>

5 <sup>1</sup>Abt. Mikrobiologie, <sup>2</sup>iBiOs – integrated Bioimaging Facility Osnabrück, <sup>3</sup>CellNanOs – Center  
6 of Cellular Nanoanalytics Osnabrück, Universität Osnabrück, Osnabrück, Germany

7

8 ORCID: 0000-0001-9948-9560, TR; 0000-0002-6710-9524, FS; 0000-0002-1304-2512, VL;  
9 0000-0001-6604-6253, MH.

10

11 Running title: Typhoidal *Salmonella* single cell analyses

12 Keywords: intracellular lifestyle, typhoidal fever, *Salmonella*-containing vacuole, fluorescent  
13 protein reporter, correlative light and electron microscopy

14

15 *Address for correspondence:*

16 Michael Hensel

17 Abteilung Mikrobiologie

18 Fachbereich Biologie/Chemie, Universität Osnabrück

19 Barbarastr. 11

20 49076 Osnabrück, Germany

21 Tel: ++ 49 (0)541 969 3940

22 E-mail: [Michael.Hensel@uni-osnabrueck.de](mailto:Michael.Hensel@uni-osnabrueck.de)

23

09.01.2021

Typhoidal *Salmonella* single cell analyses

## 24 **Abstract**

25 *Salmonella enterica* is a common foodborne, facultative intracellular enteropathogen. Human-  
26 restricted typhoidal *S. enterica* serovars Typhi (STY) or Paratyphi A (SPA) cause severe  
27 typhoid or paratyphoid fever, while *S. enterica* serovar Typhimurium (STM) has a broad host  
28 range and in human hosts usually lead to a self-limiting gastroenteritis. Due to restriction of  
29 STY and SPA to primate hosts, experimental systems for studying the pathogenesis of typhoid  
30 and paratyphoid fever are limited. Therefore, STM infection of susceptible mice is commonly  
31 considered as model system for studying these diseases. The type III secretion system encoded  
32 by *Salmonella* pathogenicity island 2 (SPI2-T3SS) is a key factor for intracellular survival of  
33 *Salmonella*. Inside host cells, the pathogen resides within the *Salmonella*-containing vacuole  
34 (SCV) and induces tubular structures extending from the SCV, termed *Salmonella*-induced  
35 filaments (SIF). This study applies a set of single cell analyses approaches such as dual  
36 fluorescent protein reports, effector translocation, or correlative light and electron microscopy  
37 to investigate the fate and activities of intracellular STY and SPA. The SPI2-T3SS of STY and  
38 SPA is functional in translocation of effector proteins, SCV and SIF formation. However, only  
39 a low proportion of intracellular STY and SPA are actively deploying SPI2-T3SS and STY and  
40 SPA exhibited a rapid decline of protein biosynthesis upon experimental induction. A role of  
41 SPI2-T3SS for proliferation of STY and SPA in epithelial cells was observed, but not for  
42 survival or proliferation in phagocytic host cells. Our results indicate that reduced intracellular  
43 activities are factors of the stealth strategy of STY and SPA and facilitate systemic spread and  
44 persistence of the typhoidal *Salmonella*.

45

09.01.2021

Typhoidal *Salmonella* single cell analyses

## 46 **Introduction**

47 *Salmonella enterica* is a versatile gastrointestinal pathogen with the ability to cause diseases  
48 ranging from acute, usually self-limiting gastroenteritis due to infections by non-typhoidal  
49 *Salmonella* (NTS) to severe systemic infections caused by typhoidal *Salmonella* (TS) serovars.  
50 Infections by *S. enterica* serovars such as Typhi (STY) and Paratyphi A (SPA) represent a  
51 continuing threat to human health. Particular in countries with low standards of hygiene, TS  
52 infections are endemic. The global burden of disease by TS infections is continuously high with  
53 about 27,000,000 infected people and 200,000 deaths annually worldwide, and the increased  
54 frequency of multidrug-resistant strains of TS, as well as coinfections cause problems for  
55 treatment of typhoid fever (Crump, Luby, & Mintz, 2004; Saleh et al., 2019).

56 While NTS infections are commonly associated with a strong inflammatory response leading  
57 to effective immune defense at the intestinal epithelium, TS infections lack this response and  
58 allow the pathogen to enter circulation and lymphatic system, and ultimately infect solid organs  
59 (reviewed in Dougan & Baker, 2014). The ability to survive phagocytosis and to persist and  
60 proliferate in infected host cells is considered a key virulence trait of *S. enterica* (Gal-Mor,  
61 2019).

62 The restriction of STY and SPA to primate host organisms limits experimental approaches to  
63 study pathogenesis of typhoid and paratyphoid fever. Infection of susceptible mice by *S.*  
64 *enterica* sv. Typhimurium (STM) is commonly considered as model system for studying the  
65 diseases caused by highly human-adapted STY and SPA. Important virulence traits of *S.*  
66 *enterica* are also investigated on the cellular level using various cell culture systems for  
67 infection.

68 The type III secretion system encoded by *Salmonella* Pathogenicity Island 2 (SPI2-T3SS) is of  
69 central importance for systemic virulence of STM in a murine infection model, as well as for  
70 intracellular proliferation in cellular infection models with human or murine cells. Intracellular  
71 *Salmonella* within the SCV deploy the SPI2-T3SS to translocate into host cells a cocktail of

09.01.2021

Typhoidal *Salmonella* single cell analyses

72 more than 30 effector proteins. These effector proteins manipulate various host cell functions  
73 such as vesicular transport, the actin and microtubule cytoskeleton, ubiquitination, apoptosis,  
74 releases of cytokines, antigen presentation by MHCII, and many more. Collectively, SPI2-T3SS  
75 effector proteins are required for intracellular survival and replication and the proliferation  
76 within host tissues. A remarkable difference between STM, STY and SPA is lack of a large  
77 number of SPI2-T3SS effector proteins in TS (reviewed in Jennings, Thurston, & Holden,  
78 2017). This is due to absence of the virulence plasmid and bacteriophage genomes harboring  
79 effector genes, and the pseudogenization of effector genes. Thus, function of the SP2-T3SS and  
80 related phenotypes may be absent or altered in cells infected by STY or SPA. If findings on the  
81 role of SPI2-T3SS made in STM are also applicable to virulence of STY and SPA has not been  
82 investigated. A prior study reported that the SPI2-T3SS is not required for the intracellular  
83 survival and replication in the human macrophage cell line THP-1 which indicates that the SPI2  
84 is not as important for STY as for STM (Forest, Ferraro, Sabbagh, & Daigle, 2010). Other  
85 studies reported requirement for SPI2-T3SS in release of typhoid toxin by cells infected by  
86 STY (Chang, Song, & Galan, 2016).

87 We set out to investigate the cellular microbiology of STY and SPA with focus on function of  
88 SPI2-T3SS and related phenotypes. To analyze the response of intracellular STM, STY or SPA  
89 to the host cell environment, we applied single cell-based approaches, such as fluorescence  
90 microscopy to follow translocation of effector protein, and correlative light and electron  
91 microscopy (CLEM) for ultrastructural analyses of the host cell endosomal system (Krieger et  
92 al., 2014), and potential manipulation by intracellular *S. enterica*. The fate of individual  
93 intracellular *S. enterica* is highly divergent (Birmingham, Smith, Bakowski, Yoshimori, &  
94 Brumell, 2006; Bumann, 2019; Helaine & Holden, 2013), thus we utilized various dual  
95 fluorescence reporters to determine the dynamic formation of distinct populations on single cell  
96 level.

09.01.2021

Typhoidal *Salmonella* single cell analyses

97 Our analyses demonstrate that the SPI2-T3SS is functional in STY and SPA and mediate  
98 endosomal remodeling similar to STM. However, this manipulation of the host cell is only  
99 observed in a small number of host cells, and the frequency of STY and SPA showing  
100 intracellular activities is much lower compared to STM. The parsimonious deployment of  
101 virulence factors such as SPI2-T3SS can be considered as part of the stealth strategy of TS and  
102 may contribute to evade host immune responses.

103

09.01.2021

Typhoidal *Salmonella* single cell analyses

## 104 **Results**

### 105 *Genes encoding the SPI2-T3SS are induced in intracellular SPA and STY*

106 To investigate the response of STY and SPA to the intracellular environment in various host  
107 cells, we analyzed if genes in SPI2 encoding the T3SS are expressed. For this, we used a  
108 fluorescent protein reporter with fusion of the promoter of *ssaG* in WT and  $\Delta$ *ssrB* strains of  
109 STM, SPA or STY. Because *ssrB* is a local transcriptional regulator of genes encoding the  
110 SPI2-T3SS, we anticipated highly reduced activation of  $P_{ssaG}::sfGFP$  in  $\Delta$ *ssrB* background  
111 (Hensel et al., 1998; Tomljenovic-Berube, Mulder, Whiteside, Brinkman, & Coombes, 2010).  
112 The functionality of the reporter was tested *in vitro* (**Fig. 1A**). In LB broth and minimal media  
113 with high phosphate concentration and neutral pH, referred to as PCN (25), pH 7.4, there was  
114 no induction of  $P_{ssaG}::sfGFP$  in STY and SPA, but slight induction in STM. In SPI2-inducing  
115 minimal media with a low phosphate concentration referred to as PCN (0.4), pH 5.8,  $P_{ssaG}$   
116 induction was detected in WT strains of the three serovars, while no induction was detected in  
117 strains with deletion of *ssrB*. The function of reporter  $P_{ssaG}::sfGFP$  and the role of SsrB in  
118 controlling SPI2 promoters in intracellular *Salmonella* was further corroborated by microscopy  
119 of STM, STY or SPA-infected host cells. Representative micrographs for HeLa infection show  
120 the expression and absence of expression in WT or  $\Delta$ *ssrB* background, respectively (**Fig. S 1**).  
121 We next determined  $P_{ssaG}$  induction by *Salmonella* in HeLa cells (**Fig. 1B**), U937 cells (**Fig.**  
122 **1C**), RAW264.7 macrophages (**Fig. 1D**), or human primary macrophages (**Fig. 1E**) as host  
123 cells. In none of these host cells, the *ssrB* mutant strains showed  $P_{ssaG}$  induction, while induction  
124 was observed in STM, STY and SPA WT strains. In HeLa cells, the three serovars showed  
125 highest sfGFP intensities at 24 h p.i., with STM always showing higher sfGFP intensities than  
126 STY or SPA. In U937 cells, STM again showed the highest sfGFP levels at 8 h, 16 h and 24 h  
127 p.i. While the intracellular population of STM and SPA showed rather uniform induction, a  
128 heterogeneous response was observed for intracellular STY, with single cells showed various

09.01.2021

## Typhoidal *Salmonella* single cell analyses

129 levels ranging from very low to high sfGFP intensities. At 24 h p.i., the distribution of the STY  
130 population changed, and sfGFP intensity increased. In the murine macrophage-like cell line  
131 RAW264.7 at 16 h p.i., the sfGFP intensities were similar for STM, STY and SPA. After  
132 activation of RAW264.7 by interferon  $\gamma$  (IFN- $\gamma$ ) STY only produced very low sfGFP  
133 fluorescence, SPA showed higher intensities, and highest signal intensities were observed for  
134 STM (**Fig. 1D**). In human primary macrophages, only a part of the population of SPA and STM  
135 WT showed higher sfGFP levels than the  $\Delta ssrB$  strains (**Fig. 1E**).

136 As a complementary approach, we analyzed U937 cells infected by STM, STY or SPA for  
137 induction of the  $P_{ssaG}::sfGFP$  reporter (**Fig. 2**). While the majority of intracellular STM showed  
138 induction of  $P_{ssaG}::sfGFP$  at 8 h p.i., a lower frequency was observed for STY and SPA under  
139 these conditions. Some U937 cells only contained  $P_{ssaG}$ -negative STY or SPA, while a larger  
140 number of host cells harbored mixtures of  $P_{ssaG}$ -positive as well as  $P_{ssaG}$ -negative bacteria.

### 141 *The SPI2-encoded type III secretion system is functional in STY and SPA*

142 Mutant strains of STM deficient in SPI2-T3SS function are highly attenuated in murine models  
143 of systemic disease, as well as in intracellular survival and proliferation in various types of  
144 murine and human host cells (Hensel et al., 1995; Hensel et al., 1998; Ochman, Soncini,  
145 Solomon, & Groisman, 1996). Genes encoding the SPI2-T3SS are present in STY and SPA and  
146 are not affected by pseudogenization. However, the functionality of SPI2-T3SS in STY and  
147 SPA has not been demonstrated experimentally.

148 We investigated the translocation of SPI2-T3SS effector proteins by intracellular STY or SPA  
149 (**Fig. 3**). For this, mutant strains deficient in the core components of SPI2-T3SS were generated  
150 by Red-mediated mutagenesis. Because antisera against effector proteins of the SPI2-T3SS are  
151 limited in availability and quality, we introduced low copy number plasmids for the expression  
152 of alleles of representative effector proteins SseF, SseJ, PipB2, and SseL tagged with HA or  
153 M45 epitope tags. Prior work reported the translocation of these tagged effector proteins by  
154 STM, and their association with late endosomal/lysosomal host cell membranes (Coombes et

09.01.2021

Typhoidal *Salmonella* single cell analyses

155 al., 2007; Hansen-Wester, Stecher, & Hensel, 2002; Knodler et al., 2003; Kuhle & Hensel,  
156 2002).

157 We observed that effector proteins were translocated into HeLa cells infected by STY or SPA  
158 WT (**Fig. 3AB**). No signals for translocated effector proteins were detected after infection with  
159 SPI2-T3SS-deficient strains, as shown for representative STY  $\Delta ssaK$  [*sseF*::M45] (**Fig. 3C**).  
160 The signal intensities of effectors translocated by STY varied, with stronger accumulation of  
161 SseF and SseL, while signals for SseJ were rather weak. After translocation by SPA, signals of  
162 similar high intensities were detected. The amounts of effector proteins detected in STY- or  
163 SPA-infected host cells were lower than for STM-infected host cells (data not shown). Also,  
164 the frequency of STY- or SPA-infected host cells that were positive of effector signals was  
165 lower.

166 We conclude that the SPI2-T3SS is functional in translocation of effector proteins by  
167 intracellular STY and SPA. However, a lower proportion of intracellular STY and SPA actively  
168 translocate SPI2-T3SS effector proteins. Translocation of SseJ is possible in STY and SPA,  
169 although *sseJ* is a pseudogene in these serovars (Jennings *et al.*, 2017).

170 *SPA and STY inhabit an SCV in infected host cells and remodel the endosomal system*

171 Several prior analyses have demonstrated that STM inhabits an individual SCV (Krieger et al.,  
172 2014; Rajashekar, Liebl, Seitz, & Hensel, 2008). A representative marker for this compartment  
173 is LAMP1, a member of the family of lysosomal glycoproteins that are membrane integral in  
174 late endosomal and lysosomal membranes. Previous work described that each intracellular  
175 bacterium is complete enclosed by LAMP1-positive membranes, resulting in individual  
176 pathogen-containing compartments (Rajashekar, Liebl, Chikkaballi, Liss, & Hensel, 2014). We  
177 investigated the formation of SCV in HeLa LAMP1-GFP (**Fig. 4**) or RAW264.7 LAMP1-GFP  
178 cells (**Fig. S 2**) infected with STM, STY, or SPA.

179 The massive reorganization of the endosomal system was observed in mammalian host cells  
180 infected by STM. One consequence of this reorganization is the formation of extensive tubular



09.01.2021

Typhoidal *Salmonella* single cell analyses

181 vesicles. *Salmonella*-induced filaments (SIF) are tubular vesicles characterized by the presence  
182 of late endosomal/lysosomal membrane markers. We investigated the formation of SIF in SPA-  
183 or STY-infected host cells. Endosomal remodeling depends on function of the SPI2-T3SS, and  
184 effector protein SifA is essential for SIF formation and integrity of the SCV (Beuzon et al.,  
185 2000; Stein, Leung, Zwick, Garcia-del Portillo, & Finlay, 1996). Infected cells were analysed  
186 for formation of SIF and we compared intracellular phenotypes of WT and  $\Delta sifA$  strains of the  
187 various serovars. In infected HeLa or RAW cells, we observed formation of LAMP1-GFP-  
188 positive membrane compartments that completely enclosed individual bacteria (**Fig. 4A**). The  
189 formation of SIF was observed in host cells infected with STM, STY or SPA WT strains, while  
190 STY  $\Delta sifA$  (**Fig. 4A**) or SPA  $\Delta sifA$  (data not shown) strains did not induce SIF. In RAW264.7  
191 macrophages, LAMP1-positive compartments were observed after phagocytosis of STM, STY,  
192 or SPA WT or SPI-T3SS-deficient strains (**Fig. S 2**). Since imaging was performed using fixed  
193 cells, SIF induction in macrophages was not assessed.

194 The frequency of SIF-positive cells infected with WT or  $\Delta sifA$  strains was quantified in HeLa  
195 cells at 16 h and 24 h p.i. (**Fig. 4B**). In line with prior observations, STM WT induced SIF in  
196 the majority of infected cells, while tubular endosomes were almost absent after infection by  
197 the STM  $\Delta sifA$  strain (1-2% positive cells). SIF formation in cells infected by STY or SPA was  
198 much less frequent and only 5% to 10% were scored positive. Cells infected with STY or SPA  
199  $\Delta sifA$  strains very rarely showed tubular endosomal compartments.

200 We further characterized the SCV using canonical markers of the endocytic pathway. The small  
201 GTPases Rab7A and Arl8A were transiently transfected in HeLa cells. To mark late endosomes  
202 and lysosomes in HeLa cells, we used fluid phase marker Dextran-Alexa647. The association  
203 of Rab7A and Arl8A with SCV and SIF was frequently observed in cells infected with STY or  
204 SPA (**Fig. S 3**).

205 We conclude that SPI2-T3SS and effector SifA can mediate endosomal remodeling by STY  
206 and SPA. However, the frequency of this manipulation of host cell functions by STY and SPA

09.01.2021

Typhoidal *Salmonella* single cell analyses

207 is highly reduced compared to STM. A role of SifA in maintaining the integrity of SCV  
208 containing STY or SPA cannot be deduced from our experimental data. The molecular  
209 composition of endosomal compartments modified by STM, STY or SPA is similar.

210 *SPA and STY induce the formation of double-membrane SIF*

211 We have recently unraveled the unique architecture of SIF induced by STM in epithelial cells  
212 and macrophages (Krieger et al., 2014). In particular, tubular compartments were delimited by  
213 vesicular single membranes, and at later time points after infection, SIF composed of double  
214 membranes were frequently observed. We analyzed if SIF induced by intracellular STY and  
215 SPA are comparable in architecture, or distinct to SIF observed in STM-infected cells. We  
216 performed CLEM analyses in order to reveal the ultrastructural features of SIF networks  
217 identified by light microscopy (**Fig. 5**). Although the frequency of STY- or SPA-infected cells  
218 with SIF was low, light microscopy allowed identification of these events for subsequent TEM  
219 analyses. As for STM, SCV harboring STY or SPA were continuous and in close contact to the  
220 bacterial envelope. In cells with an extensive SIF network, characteristic double-membrane SIF  
221 were observed in HeLa cells infected by STM, as well as by SPA, or STY (**Fig. 5, Fig. S 4, Fig.**  
222 **S 5, Fig. S 6**). SIF extending into the cell periphery were connected to the SCV. The  
223 morphological characteristics of the tubular compartments appeared comparable for the three  
224 serovars, as well as the diameter of app. 160 nm.

225 We conclude that STY and SPA can induce tubular endosomal networks comparable to those  
226 characterized in STM-infected cells.

227 *SCV integrity and cytosolic access of intracellular STY and SPA*

228 Maintenance of the integrity of the SCV is important for virulence of STM, and mutant strains  
229 deficient in SPI2-T3SS effector protein SifA are more frequently released into the cytosol of  
230 host cells. Host cells respond to cytosolic STM with xenophagic clearance, or induction of  
231 pyroptotic cell death (Birmingham et al., 2006). In epithelial cells, cytosolic hyper-replication

09.01.2021

Typhoidal *Salmonella* single cell analyses

232 of STM can lead to killing of host cells, or triggers expulsion of infected cells from polarized  
233 epithelial layers (Knodler et al., 2010). In contrast to STM, the importance of SCV integrity  
234 and potential contribution of SifA is not known for TS.

235 We recently used a dual fluorescence reporter plasmid for analyses of exposure of intracellular  
236 bacteria to host cell cytosol as result of impaired SCV integrity (Röder & Hensel, 2020). The  
237 sensor is based on the promoter of *uhpT*, a transporter for glucose-6-phosphate (G6P). As G6P  
238 is present in the cytosol of mammalian host cells, but is rapidly metabolized in bacterial cells,  
239 specific induction of this reporter occurs in STM that are in contact with host cell cytosol.

240 We tested the dual fluorescence cytosolic sensor in SPA and STY using *in vitro* growth  
241 conditions with various amounts of G6P (**Fig. 6A**). While STY showed a G6P concentration-  
242 dependent increase in sfGFP fluorescence similar to prior observations of STM (Röder &  
243 Hensel, 2020), no induction was observed for SPA. Analyses of the genome sequence of SPA  
244 indicated that the sensor-regulator system encoded by *uhpABC* is defective by pseudogene  
245 formation (Holt et al., 2009), and activation of  $P_{uhpT}$  is not possible. Thus, the  $P_{uhpT}$ -based  
246 cytosolic sensor was not applied to analyses of SPA.

247 We compared cytosolic exposure of STM and STY in HeLa cells (**Fig. 6B**), or U937  
248 macrophages (**Fig. 6C**). A rather large cytosolic-induced population was observed for STM,  
249 which increased over time. As a STM  $\Delta sifA$  strain was reported to be deficient in maintaining  
250 the integrity of the SCV, we also determined cytosolic release of a STY  $\Delta sifA$  strain. In HeLa  
251 cells infected with STM WT two populations were apparent, a sfGFP-positive population  
252 indicating cytosolic exposure, and one population without sfGFP fluorescence indicating  
253 segregation from host cell cytosol. At 16 h or 24 h p.i., STM  $\Delta sifA$  was homogenously sfGFP-  
254 positive. For STY WT, only a small population was sfGFP-induced and this population  
255 decreases over time p.i. Only very low numbers of sfGFP-positive, cytosol-exposed STY  $\Delta sifA$   
256 were detected at any timepoint. In U937 cells, a sfGFP-positive population was only detected  
257 for STM  $\Delta sifA$  at 16 or 24 h p.i. Cytosolic presence of *Salmonella* in phagocytes is known to

09.01.2021

Typhoidal *Salmonella* single cell analyses

258 trigger pyroptosis (Bergsbaken, Fink, & Cookson, 2009), and this response was also induced  
259 by STM  $\Delta$ *sifA*. However, since FC was used to analyze the same number of infected cells for  
260 the various conditions, this likely revealed the subpopulation of pre-pyroptotic macrophages  
261 harboring cytosolic-induced STM  $\Delta$ *sifA*. STM WT and STY WT and  $\Delta$ *sifA* strain did not show  
262 sfGFP fluorescence signals, indicating very low numbers of intracellular *Salmonella* exposed  
263 to host cell cytosol.

264 *The intracellular proliferation of SPI2-T3SS-deficient STY is reduced in HeLa cells*

265 Prior work corroborated that function of SPI2-T3SS is required for intracellular proliferation of  
266 STM in various cell lines and in tissue of infected hosts (Shea, Hensel, Gleeson, & Holden,  
267 1996). The role of SPI2-T3SS for intracellular proliferation of TS is still open. This lack of  
268 information and the functionality of the SPI2-T3SS demonstrated here prompted us to test for  
269 STM, STY and SPA intracellular proliferation as function of SPI2-T3SS by gentamicin  
270 protection assays (**Fig. 7**). Intracellular proliferation of SPI2-T3SS-deficient STM  $\Delta$ *ssaV* in  
271 HeLa was reduced about 10-fold. SPI2-T3SS-deficient STY  $\Delta$ *ssaR* was similar with about 8-  
272 fold attenuation compared to WT. While SPI2-T3SS-deficient STM were highly and  
273 moderately attenuated in proliferation in RAW264.7 and U937 macrophages, respectively, no  
274 attenuation was observed for STY *ssaR*.

275 The data shown in **Fig. 1** and **Fig. 4** indicate that only a small fraction of intracellular STY or  
276 SPA deploys the SPI2-T3SS. Thus, the intracellular proliferation of STY may be low overall,  
277 and the deficient in proliferation of a SPI2-T3SS-deficient strain may be masked by a large  
278 number of intracellular STY that survive but fail to proliferate. To address intracellular  
279 proliferation on the levels of single host cells, we deployed FC and determined mCherry-  
280 mediated fluorescence as proxy for bacterial load. We recently compared properties of various  
281 FP and identified fast-maturing, constitutively expressed mCherry as reliable indicator for  
282 proliferation of intracellular bacteria (Schulte, Olschewski, & Hensel, 2020).

09.01.2021

Typhoidal *Salmonella* single cell analyses

283 Analyses of single host cells (**Fig. 8, Fig. S 7**) confirmed the SPI2-T3SS-dependent intracellular  
284 proliferation of STM in HeLa, RAW264.7 and U937, and of STY in HeLa. The X-means for  
285 RAW264.7 or U937 harboring STY also increased from 1 h p.i. to 24 h p.i. This increase was  
286 rather small and independent from function of the SPI2-T3SS. Interestingly, STM also showed  
287 SPI2-T3SS-independent increase of bacterial mCherry fluorescence in HeLa, RAW264.7, and  
288 U937 cells, but the increase was always reduced compared to proliferation of STM WT.  
289 Taken together, these results support a role of SPI2-T3SS in intracellular proliferation of STY  
290 in HeLa cells, and redundancy of SPI2-T3SS function for proliferation in the phagocytic cell  
291 lines investigated.

292 *Biosynthetic capability of intracellular STM, SPA and STY*

293 Finally, we set out to determine the proportion of intracellular STM, SPA or STY that remain  
294 capable in protein biosynthesis upon application of an external stimulus. We anticipated that  
295 dead bacteria, and those that have entered a persister state are highly reduced in protein  
296 biosynthesis and unable to respond to an external stimulus. As experimental system, we  
297 introduced in STM, STY and SPA a dual fluorescence plasmid for constitutive expression of  
298 DsRed, and expression of sfGFP under control of the promoter of *tetA*. We recently  
299 demonstrated that  $P_{tetA}$  can be efficiently activated in intracellular *Salmonella* by external  
300 addition of the inducer anhydrotetracycline (AHT) (Schulte et al., 2019). Under culture  
301 conditions in medium, sfGFP synthesis was induced by addition of AHT in STM, SPA or STY  
302 to comparable levels (**Fig. 9A**). After infection of various host cell types by STM, SPA or STY,  
303 inducer AHT was added to infected cells 1.5 h prior to the end of the infection period and lysis  
304 of host cells (**Fig. 9B**). In HeLa cells 8 h p.i., around 80% of the bacteria showed induction, and  
305 the intensities for STY cells were higher than for STM and SPA (**Fig. 9C**). The proportion of  
306 induced STM remained high at 16 h and 24 h p.i., while the percentage of AHT-induced STY  
307 and SPA declined at 16 h and 24 h p.i., as well as sfGFP intensities of induced *Salmonella*.

09.01.2021

Typhoidal *Salmonella* single cell analyses

308 In human U937 macrophages (**Fig. 9D**), a similar percentage of AHT-inducible bacteria was  
309 determined 8 h p.i. for all serovars. At later time points p.i., the amounts of AHT-inducible SPA  
310 and STY dropped, while STM remained at more than 85% AHT-inducible bacteria at all time  
311 points.

312 In murine RAW264.7 macrophages (**Fig. 9E**), we observed a high percentage of AHT-inducible  
313 STM, SPA, and STY at the early time point of 3 h p.i., however, the level of sfGFP fluorescence  
314 was lower in the induced SPA population compared to induced STM and STY. A further  
315 decrease in sfGFP expression was observed for SPA at 8 h p.i., while the percentage of induced  
316 STM and STY increased to more than 92%. At 24 h p.i. STM showed a large population of  
317 AHT-inducible cells (64%), while the population of AHT-inducible STY was decreased in size,  
318 and induced STY showed lower sfGFP intensities. For SPA, an almost complete shift to the  
319 non-inducible population was observed.

320 The analyzed serovars are rather distinct in their ability to respond to intracellular environments.  
321 STM appeared most robust and biosynthetic active populations of similar size were detected in  
322 all host cell types and any time point. STY showed highest percentage of biosynthetic active  
323 bacteria at early time points in all cell lines analyzed, and the proportion of AHT-inducible cells  
324 decreased in all host cell types at 16 and 24 h p.i. The level of sfGFP expression of proportion  
325 of AHT-inducible SPA was already reduced at early time points and further decreased over  
326 time, indicating a continuous loss of biosynthetic capacity over time. The effect was most  
327 pronounced in RAW264.7 cells. We conclude that STY and SPA have a lower capacity than  
328 STM to maintain a biosynthetic active state over prolonged presence in host cells.

329

09.01.2021

Typhoidal *Salmonella* single cell analyses

## 330 **Discussion**

331 Our study investigated the intracellular lifestyle of STY and SPA as clinically most relevant  
332 serovars of TS. We demonstrated that SPI2-T3SS is functional in translocating effector proteins  
333 that induce endosomal remodeling, and formation and maintenance of SCV. The SPI2-T3SS-  
334 dependent remodeling of the endosomal system by STY and SPA was reminiscent of the  
335 phenotypes observed in STM-infected cells. By this, we provide formal proof of the function  
336 of the SPI2-T3SS in human-adapted TS serovars. As major difference in intracellular  
337 phenotypes of SPA and STY compared to STM, we observed the delayed activation and overall  
338 lower frequency of intracellular *Salmonella* showing activity of SPI2-T3SS and related  
339 phenotypes. Furthermore, the population of intracellular STY exhibits larger heterogeneity. In  
340 the following these aspects are discussed in more detail.

### 341 *Low intracellular activity of TS*

342 Compared to STM, intracellular STY and SPA formed smaller populations of bacteria with  
343 SPI2-T3SS function and more general, biosynthetic activity in response to artificial induction.  
344 SPI2-T3SS function mediated proliferation in HeLa but not in the more restrictive environment  
345 of macrophages. These observations indicate that STY and SPA are either more efficiently  
346 killed by host cells, or more frequently develop persister state. Persister bacteria are key  
347 contributors to persistent as well as recurring infections (Lewis, 2010), and both phenomena  
348 are characteristic to infectious diseases caused by TS (Gal-Mor, 2019). Future studies have to  
349 reveal the role of persister formation of intracellular STY and SPA and the contribution of  
350 persister bacteria to pathogenesis of TS infections.

### 351 *Role of the SPI2-T3SS in TS*

352 We previously demonstrated that SPI2-T3SS-mediated SIF formation augments nutritional  
353 supply of STM in the SCV, and also leads to reduction of antimicrobial factors acting on  
354 bacteria in the SCV (Liss et al., 2017; Noster et al., 2019). Since SIF formation is less frequent

09.01.2021

## Typhoidal *Salmonella* single cell analyses

355 in host cells infected by STY or SPA compared to STM, this may indicate a restricted nutritional  
356 supply, leading to limited intracellular proliferation. As STY and SPA are auxotrophic for  
357 cysteine and tryptophan (McClelland et al., 2004) the demand for external supply with amino  
358 acids is higher than for prototrophic STM. Furthermore, exposure to effectors of host cell  
359 defense mechanisms may be increased for STY or SPA in SCV without SIF connection. Further  
360 single cell analyses can address this potential correlation between SIF formation and  
361 proliferation for intracellular TS.

362 Our work confirms prior reports that SPI2-T3SS is not required for net survival and  
363 proliferation of STY in infection models with human macrophages (Forest et al., 2010). Our  
364 observation that only a small percentage of bacteria synthesize SPI2-T3SS and deploy its  
365 function would also allow alternative explanations. In ensemble-based analyses such as the  
366 gentamicin protection assay, ongoing proliferation in a small number of infected host cells may  
367 be masked by the majority of infected cells that kill the pathogen or restrict its proliferation.  
368 Even if the number of permissive infected cells is low, these may play an important role for  
369 progression of a systemic infection (Brown et al., 2006). The application of single cell FC  
370 analyses will allow future in-depth analyses of the fate of TS in distinct subpopulations of host  
371 cells.

### 372 *Role of SPI2-T3SS effector proteins in TS*

373 The SPI2-T3SS in STM translocates a complex set of more than 30 effector proteins into  
374 infected host cells. These effector proteins form subsets that act on the endosomal system, affect  
375 innate immune signaling, formation of adaptive immunity, interfere with ubiquitination, or have  
376 functions still unknown (Jennings et al., 2017). The repertoire of effector proteins in STY and  
377 SPA is severely restricted, with intact genes only for 11 or 8 effector proteins in STY and SPA,  
378 respectively (Jennings et al., 2017). This observation may reflect the adaptation to a narrow  
379 host range accompanied by loss of redundant effectors. Of note, the subset of effector proteins  
380 involved in endosomal remodeling (SseF, SseG, SifA, PipB2, SteA) is present. We showed that



09.01.2021

Typhoidal *Salmonella* single cell analyses

381 SifA is required for induction of SIF formation in STY and SPA similar to STM. However, our  
382 analyses did not support a contribution of SIF in maintaining the SCV integrity in cells infected  
383 by STY. Among other sequence variations, the altered sequence of the C-terminal membrane  
384 anchoring hexapeptide (Boucrot, Beuzon, Holden, Gorvel, & Meresse, 2003) may affect  
385 function of SifA in STY.

386 Also present in STM, STY and SPA is SteD, an effector protein modulating adaptive immunity  
387 (Bayer-Santos et al., 2016). The activation of CD4<sup>+</sup> T cells is very important for the elimination  
388 of *Salmonella* in mice and human. In STM, SteD stimulates the ubiquitination of MHCII,  
389 leading to its degradation and therefor prevention of antigen presentation by MHCII (Bayer-  
390 Santos et al., 2016). SteD is present in STY and SPA, but shows subtle differences in amino  
391 acid sequence. Thus, it is not certain whether SteD exhibits the same function in STY or SPA  
392 as in STM. Because interference with host adaptive immunity is of central importance of  
393 persistent infections as caused by TS, the function of SteD in STY and SPA deserves further  
394 investigation.

395 It was reported that effector protein SteE of STM directs macrophage polarization towards an  
396 anti-inflammatory M2 state (Stapels et al., 2018). However, STY and SPA lack SteE and are  
397 unlikely to manipulate the activation state of macrophages by this mechanism. Uptake by  
398 macrophages may be fatal for individual STY or SPA during infection, and phagocytic cells  
399 with other properties, such as dendritic cells, could form important vehicles of systemic  
400 distribution of TS. Again, host specificity and low numbers of STY- or SPA-infected cells in  
401 human blood are obstacles to more detailed analyses.

402 Additional effector proteins that are specific to STY and SPA may be present and mediate  
403 serovar-specific properties. One example is StoD, an E3/E4 ubiquitin ligase that is translocated  
404 by the SPI1-T3SS (McDowell et al., 2019). A systematic screen by bioinformatics tools and  
405 experimental validation may identify TS-specific effector proteins of SPI2-T3SS.

406 *Need of suitable infection models for TS*

09.01.2021

Typhoidal *Salmonella* single cell analyses

407 We observed distinct intracellular phenotypes in the various cell lines and primary cells used  
408 in this study. However, the specific virulence properties of TS and the contribution of SPI2-  
409 T3SS require analyses in improved infection models. Of specific interest will be organoids of  
410 human origin that are capable to simulate tissues that are infected by STY or SPA. In the human  
411 body, STY persistently colonizes gallbladder and bone marrow. *Salmonella* is resistant to high  
412 concentrations of bile and bile also has an influence on the invasion of epithelial cells by  
413 *Salmonella* (Prouty, Schwesinger, & Gunn, 2002). Bile induces persister cell formation of STY  
414 and an associated tolerance to antibiotics (Walawalkar, Vaidya, & Nayak, 2016). It is also  
415 known that STY forms biofilm in the gallbladder and on gallstones. This could lead to constant  
416 inflammation of gallbladder tissue, and during persistent infection to development of  
417 gallbladder cancer (Di Domenico, Cavallo, Pontone, Toma, & Ensoli, 2017). The formation of  
418 biofilm enables STY to adapt a carrier state in the host, which occurs in about 3 – 5% of the  
419 infected people (Prouty et al., 2002). For example, a recently organoid model to human  
420 gallbladder epithelium may provide new options to study TS in a setting of a persistent infection  
421 (Sepe et al., 2020). If SPI2-T3SS effector functions beyond intracellular survival and  
422 proliferation should be analyzed, even more complex experimental systems with human  
423 immune cells are required. As alternative, a humanized mouse model based on transplantation  
424 of human immune cells may be considered (Karlinsky et al., 2019). A genome-wide screen for  
425 genes required for survival in STY in humanized mice did not reveal contributions of SPI2-  
426 T3SS or effector protein. Since the initial screen was performed using an infection period of 24  
427 h, identification of STY factors affecting formation of adaptive immune responses were not  
428 identified. Future analyses in the humanized mouse model under conditions allowing persistent  
429 infection will be of interest, but the high demands of the complex model may compromise more  
430 frequent applications.

431 *Concluding remarks*

09.01.2021

Typhoidal *Salmonella* single cell analyses

432 This study demonstrated that the functionality of SPI2-T3SS in STY and SPA, and future  
433 studies with improved infection models have to reveal the contribution of this virulence factor  
434 to pathogenesis of infectious diseases by TS. We applied a set of single cell approaches to study  
435 the intracellular adaptation strategies of STM as NTS serovar in comparison to TS serovars  
436 STY and SPA. These analytic tools enabled a detailed view on the specific intracellular  
437 activities of NTS and TS, and will enable future in-depth characterization of bacterial  
438 heterogeneity and adaptation strategies.

439

440 *Acknowledgements*

441 This work was supported by BMBF grant within the Infect-ERA consortium SalHostTrop. We  
442 thank Dr. Ohad Gal-Mor for providing STY and SPA strains, and the members of the  
443 SalHostTrop consortium for fruitful discussions.

444

09.01.2021

Typhoidal *Salmonella* single cell analyses

## 445 **Materials and Methods**

### 446 *Bacterial strains and culture conditions*

447 For this study *Salmonella enterica* serovar Typhimurium (STM) NCTC12023, *S. enterica*  
448 serovar Typhi (STY), and *S. enterica* serovar Paratyphi A (SPA) were used as wild-type (WT)  
449 strains. All mutant strains are isogenic to the respective WT and Table 1 shows characteristics  
450 of strains used in this study. STM, STY and SPA strains were routinely grown on Luria-Bertani  
451 broth (LB) agar or in LB broth containing 50  $\mu\text{g} \times \text{ml}^{-1}$  carbenicillin for maintenance of plasmids  
452 at 37 °C using a roller drum. As synthetic media, PCN (Phosphate, Carbon, Nitrogen) was used  
453 as described before (Löber, Jäckel, Kaiser, & Hensel, 2006) with the indicated pH  
454 concentrations of inorganic phosphate. For culture of STY and SPA, PCN media were  
455 supplemented with 20  $\mu\text{g} \times \text{ml}^{-1}$  of each cysteine and tryptophan.

### 456 *Generation of bacterial strains*

457 Mutant strains harboring deletions in various virulence genes were generated by  $\lambda$  Red  
458 recombineering for insertion of the kanamycin resistance cassette amplified from template  
459 plasmid pKD13 basically as described before (Chakravortty, Hansen-Wester, & Hensel, 2002;  
460 Datsenko & Wanner, 2000) using oligonucleotides listed in Table S 2. The proper insertion was  
461 confirmed by colony PCR. If required, the *aph* cassette was removed by introduction of pE-  
462 FLP and FLP-mediated recombination. Plasmids used in this study are listed in Table 2 and  
463 were introduced into various WT and mutant strains by electroporation.

### 464 *Host cell culture and infection*

465 The murine macrophage cell line RAW264.7 (American Type Culture Collection, ATCC no.  
466 TIB-71) was cultured in high-glucose (4.5  $\text{g} \times \text{ml}^{-1}$ ) Dulbecco's modified Eagle's medium  
467 (DMEM) containing 4 mM stable glutamine (Merck) and supplemented with 6% inactivated  
468 fetal calf serum (iFCS, Sigma). The human macrophage-like cell line U937 (ATCC no. CRL-  
469 1593.2) was cultured in RPMI-1640 medium (Merck) supplemented with 10% iFCS. Human

09.01.2021

## Typhoidal *Salmonella* single cell analyses

470 primary macrophages isolated from buffy coat were cultured in RPMI-1640 medium  
471 supplemented with 20% iFCS. The non-polarized epithelial cell line HeLa (ATCC no. CCL-2)  
472 was cultured in high-glucose DMEM containing 4 mM stable glutamine, sodium pyruvate and  
473 supplemented with 10% iFCS. Stably transfected HeLa cell lines expressing LAMP1-GFP were  
474 cultured under the same conditions. All cells were cultured at 37 °C in an atmosphere containing  
475 5% CO<sub>2</sub> and absolute humidity.

### 476 *Gentamicin protection assay*

477 The assay was performed as described before (Kuhle & Hensel, 2002). Briefly, RAW264.7  
478 cells were seeded 24 or 48 h prior infection in a surface-treated 24 well plate (TPP) to reach  
479 confluency (~4 x 10<sup>5</sup> cells per well) on the day of infection. U937 cells were seeded 72 h prior  
480 infection in surface-treated 24 well plates (TPP) to reach confluency (~4 x 10<sup>5</sup> cells per well)  
481 on the day of infection and were treated with 50 ng x μl<sup>-1</sup> PMA for differentiation and cell  
482 attachment. HeLa cells were seeded 48 h prior infection in surface-treated 24 well plates (TPP)  
483 to reach confluency (~2 x 10<sup>5</sup> cells per well) on the day of infection. For infection of RAW264.7  
484 and U937 cells, bacteria were grown overnight (~ 20 h) aerobically in LB medium. For infection  
485 of HeLa cells, fresh LB medium was inoculated 1:31 with overnight cultures of STM and  
486 incubated for 2.5 h with agitation. For subculture of STY and SPA, 10 ml fresh LB medium  
487 was inoculated 1:100 with aerobic over day cultures and grown static under microaerophilic  
488 conditions for 16 h (Elhadad, Desai, Rahav, McClelland, & Gal-Mor, 2015). Then the bacteria  
489 were adjusted to an OD<sub>600</sub> of 0.2 in PBS and further diluted in DMEM (RAW and HeLa cells)  
490 or RPMI medium (U937 cells) for infection of cells at a MOI of 1. Bacteria were centrifuged  
491 onto the cells for 5 min at 500 x g, and the infection was allowed to proceed for 25 min. After  
492 three washing steps with PBS, medium containing 100 μg x ml<sup>-1</sup> gentamicin was added for 1 h  
493 to kill extracellular bacteria. Afterwards the cells were incubated with medium containing 10  
494 μg x ml<sup>-1</sup> gentamicin for the ongoing experiment. Cells were washed three times with PBS and  
495 lysed using 0.1% Triton X-100 at 2 and 24 h post infection (p.i.). Colony forming units (CFU)

09.01.2021

## Typhoidal *Salmonella* single cell analyses

496 were determined by plating serial dilutions of lysates and inoculum on Mueller-Hinton II agar  
497 and incubated overnight at 37 °C. The percentage of phagocytosed bacteria as well as the  
498 replication rate was calculated.

### 499 *Infection experiments for microscopy*

500 HeLa cells stably transfected and expressing LAMP1-GFP were seeded in 24 well plates (TPP)  
501 on coverslips. The cells were grown to 80% confluency ( $\sim 1.8 \times 10^5$ ) on the day of infection.  
502 The cells were infected with STM, STY and SPA strains as described above with aerobic 2.5 h  
503 (for STM) and microaerobic, static 16 h (for STY, SPA) bacterial subcultures. For detection  
504 SPI2-T3SS effector protein translocation, MOI of 75 was used for infection and cells were  
505 analyzed 9 h p.i. For visualization of bacteria harboring reporter plasmids, MOI 50 was used  
506 for STM and SPA, and MOI 75 was used for STY. Afterwards the cells were washed three  
507 times with PBS and fixed with 3% paraformaldehyde (PFA) in PBS.

### 508 *Transfection*

509 HeLa cells were cultured in 8-well dishes (ibidi) for one day. One  $\mu\text{g}$  of plasmid DNA of various  
510 transfection vectors was diluted in 25  $\mu\text{l}$  DMEM without iFCS and mixed with 1  $\mu\text{l}$  FUGENE  
511 reagent (ratio of 1:2 for DNA to FUGENE). The transfection mix was incubated for 10 min at  
512 room temperature (RT) and added to the cells in DMEM with 10% iFCS for at least 18 h. Before  
513 infection, the cells were treated with fresh medium.

### 514 *Pulse-chase with fluid phase markers*

515 The fluid phase marker AlexaFluor 647-conjugated dextran (dextran-A647), molecular weight  
516 10,000 (Molecular Probes) was used for tracing the endocytic pathway. HeLa cells were  
517 incubated with 100  $\mu\text{g} \times \text{ml}^{-1}$  dextran-A647 1 h p.i. until fixation of the cells. Subsequently,  
518 cells were washed and prepared for microscopy.

### 519 *Immuno-staining and fluorescence microscopy*

09.01.2021

## Typhoidal *Salmonella* single cell analyses

520 Cells fixed with 3% PFA were washed three times with PBS and incubated in blocking solution  
521 (2% goat serum, 2% BSA and 0.1% saponin in PBS) for 30 min. Next, cells were stained for  
522 1 h at RT with primary antibodies against *Salmonella* O-Ag of STM, STY and SPA (1:500),  
523 anti-HA (1:500) or anti-M45 (1:10). Accordingly, secondary antibodies were selected and  
524 samples were incubated for 1 h. Antisera and antibodies used in this study are listed in Table S  
525 1. Coverslips were mounted with Fluoroprep (Biomerieux) and sealed with Entellan (Merck).  
526 The microscopy was performed with the confocal laser-scanning microscope Leica SP5 using  
527 the 100x objective (HCX PL APO CS 100 x, NA 1.4-0.7) and the polychroic mirror TD  
528 488/543/633 for the three channels GFP, TMR/Alexa568, Cy5 (Leica, Wetzlar, Germany). For  
529 image processing, the LAS-AF software (Leica, Wetzlar, Germany) was used.

### 530 *Flow cytometry analyses*

531 Cells were seeded in 12-well plates (TPP) 48 h (HeLa and RAW264.7), or 72 h (U937) prior  
532 infection to reach confluency on the day of infection (HeLa cells:  $4 \times 10^5$  cells/well, RAW264.7:  
533  $8 \times 10^5$  cells/well, U937:  $7 \times 10^5$  cells/well). U937 cells were treated with  $50 \text{ ng} \times \mu\text{l}^{-1}$  PMA.  
534 RAW264.7, HeLa or U937 cells were infected with STM, STY and SPA WT or  $\Delta\text{ssrB}$  and  
535  $\Delta\text{sifA}$  strains at MOI of 30 as described before. The bacterial strains harbored plasmids  
536 constitutively expressed RFP (p3776, p4928) or DsRed (p4889), and expressed sfGFP after  
537 activation of respective promoters. To determine metabolic activity, cells infected with  
538 *Salmonella* harboring plasmid p4928 were induced 2 h before fixation by addition of AHT to  
539  $50 \text{ ng} \times \text{ml}^{-1}$ . At 8, 16, or 24 h p.i., cells were washed with PBS, detached from the culture  
540 plates, lysed with 0.1% Triton X-100, fixed with 3% PFA and analyzed by flow cytometry  
541 using an Attune NxT cytometer (Life Technologies, Thermo Fischer). At least 10,000 RFP- or  
542 DsRed-positive cells were measured and the cells expressing red and green fluorescence were  
543 analyzed.

### 544 *Flow cytometry analyses of whole cells*

09.01.2021

Typhoidal *Salmonella* single cell analyses

545 Cells were seeded in 6 well plates (TPP) 48 h (HeLa and RAW264.7), or 72 h (U937) prior infection to  
546 reach confluency on the day of infection (HeLa cells:  $8 \times 10^5$  cells/well, RAW264.7:  $1.6 \times 10^6$  cells/well,  
547 U937:  $1.4 \times 10^6$  cells/well). U937 cells were treated with  $50 \text{ ng} \times \mu\text{l}^{-1}$  PMA. RAW264.7, HeLa or U937  
548 cells were infected with STM, STY and SPA WT or SPI2-T3SS-deficient strains ( $\Delta\text{ssaV}$ ,  $\Delta\text{ssaK}$ , or  
549  $\Delta\text{ssaR}$ ) at MOI 10 as described before. The bacterial strains harbored plasmids constitutively expressing  
550 mCherry. At 1 h and 24 h p.i., cells were washed with PBS, detached from the culture plates, fixed with  
551 3% PFA and analyzed by flow cytometry using an Attune NxT cytometer. At least 10,000 mCherry-  
552 positive cells were measured and intensities of mCherry fluorescence signals per host cell were  
553 quantified.

554



555 **References**

- 556 Bayer-Santos, E., Durkin, C. H., Rigano, L. A., Kupz, A., Alix, E., Cerny, O., . . . Holden, D.  
557 W. (2016). The *Salmonella* effector SteD mediates MARCH8-dependent  
558 ubiquitination of MHC II molecules and inhibits T cell activation. *Cell Host Microbe*,  
559 20(5), 584-595. doi:10.1016/j.chom.2016.10.007
- 560 Bender, J. K., Wille, T., Blank, K., Lange, A., & Gerlach, R. G. (2013). LPS structure and  
561 PhoQ activity are important for *Salmonella* Typhimurium virulence in the *Galleria*  
562 *mellonella* infection model [corrected]. *PLoS One*, 8(8), e73287.  
563 doi:10.1371/journal.pone.0073287
- 564 Bergsbaken, T., Fink, S. L., & Cookson, B. T. (2009). Pyroptosis: host cell death and  
565 inflammation. *Nat. Rev. Microbiol.*, 7(2), 99-109. doi:nrmicro2070 [pii]  
566 10.1038/nrmicro2070
- 567 Beuzon, C. R., Meresse, S., Unsworth, K. E., Ruiz-Albert, J., Garvis, S., Waterman, S. R., . . .  
568 Holden, D. W. (2000). *Salmonella* maintains the integrity of its intracellular vacuole  
569 through the action of SifA. *EMBO J*, 19(13), 3235-3249.  
570 doi:10.1093/emboj/19.13.3235
- 571 Birmingham, C. L., Smith, A. C., Bakowski, M. A., Yoshimori, T., & Brumell, J. H. (2006).  
572 Autophagy controls *Salmonella* infection in response to damage to the *Salmonella*-  
573 containing vacuole. *J Biol Chem*, 281(16), 11374-11383.  
574 doi:10.1074/jbc.M509157200
- 575 Boucrot, E., Beuzon, C. R., Holden, D. W., Gorvel, J. P., & Meresse, S. (2003). *Salmonella*  
576 *typhimurium* SifA effector protein requires its membrane-anchoring C-terminal  
577 hexapeptide for its biological function. *J Biol Chem*, 278(16), 14196-14202.  
578 doi:10.1074/jbc.M207901200
- 579 Brown, S. P., Cornell, S. J., Sheppard, M., Grant, A. J., Maskell, D. J., Grenfell, B. T., &  
580 Mastroeni, P. (2006). Intracellular demography and the dynamics of *Salmonella*  
581 *enterica* infections. *PLoS Biol*, 4(11), e349. doi:10.1371/journal.pbio.0040349
- 582 Bumann, D. (2019). *Salmonella* single-cell metabolism and stress responses in complex host  
583 tissues. *Microbiol Spectr*, 7(2). doi:10.1128/microbiolspec.BAI-0009-2019
- 584 Chakravorty, D., Hansen-Wester, I., & Hensel, M. (2002). *Salmonella* pathogenicity island 2  
585 mediates protection of intracellular *Salmonella* from reactive nitrogen intermediates. *J*  
586 *Exp Med*, 195(9), 1155-1166. doi:10.1084/jem.20011547
- 587 Chang, S. J., Song, J., & Galan, J. E. (2016). Receptor-mediated sorting of typhoid toxin  
588 during its export from *Salmonella* Typhi-infected cells. *Cell Host Microbe*, 20(5), 682-  
589 689. doi:10.1016/j.chom.2016.10.005
- 590 Coombes, B. K., Lowden, M. J., Bishop, J. L., Wickham, M. E., Brown, N. F., Duong, N., . . .  
591 Finlay, B. B. (2007). SseL is a *Salmonella*-specific translocated effector integrated  
592 into the SsrB-controlled *Salmonella* pathogenicity island 2 type III secretion system.  
593 *Infect Immun*, 75(2), 574-580. doi:10.1128/IAI.00985-06
- 594 Crump, J. A., Luby, S. P., & Mintz, E. D. (2004). The global burden of typhoid fever. *Bull*  
595 *World Health Organ*, 82(5), 346-353. Retrieved from  
596 <https://www.ncbi.nlm.nih.gov/pubmed/15298225>
- 597 Datsenko, K. A., & Wanner, B. L. (2000). One-step inactivation of chromosomal genes in  
598 *Escherichia coli* K-12 using PCR products. *Proc. Natl. Acad. Sci. U S A*, 97(12),  
599 6640-6645. Retrieved from 10829079
- 600 Di Domenico, E. G., Cavallo, I., Pontone, M., Toma, L., & Ensoli, F. (2017). Biofilm  
601 producing *Salmonella* Typhi: chronic colonization and development of gallbladder  
602 cancer. *Int J Mol Sci*, 18(9). doi:10.3390/ijms18091887

09.01.2021

Typhoidal *Salmonella* single cell analyses

- 603 Dougan, G., & Baker, S. (2014). *Salmonella enterica* serovar Typhi and the pathogenesis of  
604 typhoid fever. *Annu Rev Microbiol*, 68, 317-336. doi:10.1146/annurev-micro-091313-  
605 103739
- 606 Drecktrah, D., Levine-Wilkinson, S., Dam, T., Winfree, S., Knodler, L. A., Schroer, T. A., &  
607 Steele-Mortimer, O. (2008). Dynamic behavior of *Salmonella*-induced membrane  
608 tubules in epithelial cells. *Traffic*, 9(12), 2117-2129. doi:TRA830 [pii]  
609 10.1111/j.1600-0854.2008.00830.x
- 610 Elhadad, D., Desai, P., Rahav, G., McClelland, M., & Gal-Mor, O. (2015). Flagellin is  
611 required for host cell invasion and normal *Salmonella* Pathogenicity Island 1  
612 expression by *Salmonella enterica* serovar Paratyphi A. *Infect Immun*, 83(9), 3355-  
613 3368. doi:10.1128/IAI.00468-15
- 614 Forest, C. G., Ferraro, E., Sabbagh, S. C., & Daigle, F. (2010). Intracellular survival of  
615 *Salmonella enterica* serovar Typhi in human macrophages is independent of  
616 *Salmonella* pathogenicity island (SPI)-2. *Microbiology*, 156(Pt 12), 3689-3698.  
617 doi:10.1099/mic.0.041624-0
- 618 Gal-Mor, O. (2019). Persistent infection and long-term carriage of typhoidal and nontyphoidal  
619 *Salmonellae*. *Clin Microbiol Rev*, 32(1). doi:10.1128/CMR.00088-18
- 620 Hansen-Wester, I., Stecher, B., & Hensel, M. (2002). Type III secretion of *Salmonella*  
621 *enterica* serovar Typhimurium translocated effectors and SseFG. *Infect. Immun.*,  
622 70(3), 1403-1409. doi:10.1128/iai.70.3.1403-1409.2002.
- 623 Helaine, S., & Holden, D. W. (2013). Heterogeneity of intracellular replication of bacterial  
624 pathogens. *Curr Opin Microbiol*, 16(2), 184-191. doi:10.1016/j.mib.2012.12.004
- 625 Hensel, M., Shea, J. E., Gleeson, C., Jones, M. D., Dalton, E., & Holden, D. W. (1995).  
626 Simultaneous identification of bacterial virulence genes by negative selection.  
627 *Science*, 269(5222), 400-403. doi:10.1126/science.7618105.
- 628 Hensel, M., Shea, J. E., Waterman, S. R., Mundy, R., Nikolaus, T., Banks, G., . . . Holden, D.  
629 W. (1998). Genes encoding putative effector proteins of the type III secretion system  
630 of *Salmonella* pathogenicity island 2 are required for bacterial virulence and  
631 proliferation in macrophages. *Mol Microbiol*, 30(1), 163-174. doi:10.1046/j.1365-  
632 2958.1998.01047.x
- 633 Hoffmann, S., Schmidt, C., Walter, S., Bender, J. K., & Gerlach, R. G. (2017). Scarless  
634 deletion of up to seven methyl-accepting chemotaxis genes with an optimized method  
635 highlights key function of CheM in *Salmonella* Typhimurium. *PLoS One*, 12(2),  
636 e0172630. doi:10.1371/journal.pone.0172630
- 637 Holt, K. E., Thomson, N. R., Wain, J., Langridge, G. C., Hasan, R., Bhutta, Z. A., . . .  
638 Parkhill, J. (2009). Pseudogene accumulation in the evolutionary histories of  
639 *Salmonella enterica* serovars Paratyphi A and Typhi. *BMC Genomics*, 10, 36.  
640 doi:10.1186/1471-2164-10-36
- 641 Jennings, E., Thurston, T. L. M., & Holden, D. W. (2017). *Salmonella* SPI-2 Type III  
642 secretion system effectors: molecular mechanisms and physiological consequences.  
643 *Cell Host Microbe*, 22(2), 217-231. doi:10.1016/j.chom.2017.07.009
- 644 Karlinsey, J. E., Stepien, T. A., Mayho, M., Singletary, L. A., Bingham-Ramos, L. K., Brehm,  
645 M. A., . . . Fang, F. C. (2019). Genome-wide analysis of *Salmonella enterica* serovar  
646 Typhi in humanized mice reveals key virulence features. *Cell Host Microbe*, 26(3),  
647 426-434 e426. doi:10.1016/j.chom.2019.08.001
- 648 Knodler, L. A., Vallance, B. A., Celli, J., Winfree, S., Hansen, B., Montero, M., & Steele-  
649 Mortimer, O. (2010). Dissemination of invasive *Salmonella* via bacterial-induced  
650 extrusion of mucosal epithelia. *Proc. Natl. Acad. Sci. U S A*, 107(41), 17733-17738.  
651 doi:1006098107 [pii] 10.1073/pnas.1006098107
- 652 Knodler, L. A., Vallance, B. A., Hensel, M., Jackel, D., Finlay, B. B., & Steele-Mortimer, O.  
653 (2003). *Salmonella* type III effectors PipB and PipB2 are targeted to detergent-

09.01.2021

Typhoidal *Salmonella* single cell analyses

- 654 resistant microdomains on internal host cell membranes. *Mol Microbiol*, 49(3), 685-  
655 704. doi:10.1046/j.1365-2958.2003.03598.x
- 656 Krieger, V., Liebl, D., Zhang, Y., Rajashekar, R., Chlanda, P., Giesker, K., . . . Hensel, M.  
657 (2014). Reorganization of the endosomal system in *Salmonella*-infected cells: the  
658 ultrastructure of *Salmonella*-induced tubular compartments. *PLoS Pathog*, 10(9),  
659 e1004374. doi:10.1371/journal.ppat.1004374
- 660 Kuhle, V., & Hensel, M. (2002). SseF and SseG are translocated effectors of the type III  
661 secretion system of *Salmonella* pathogenicity island 2 that modulate aggregation of  
662 endosomal compartments. *Cell. Microbiol.*, 4(12), 813-824. Retrieved from 12464012
- 663 Lewis, K. (2010). Persister cells. *Annu Rev Microbiol*, 64, 357-372.  
664 doi:10.1146/annurev.micro.112408.134306
- 665 Liss, V., Swart, A. L., Kehl, A., Hermanns, N., Zhang, Y., Chikkaballi, D., . . . Hensel, M.  
666 (2017). *Salmonella enterica* remodels the host cell endosomal system for efficient  
667 intravacuolar nutrition. *Cell Host Microbe*, 21(3), 390-402.  
668 doi:10.1016/j.chom.2017.02.005
- 669 Löber, S., Jäckel, D., Kaiser, N., & Hensel, M. (2006). Regulation of *Salmonella*  
670 pathogenicity island 2 genes by independent environmental signals. *Int. J. Med.*  
671 *Microbiol.*, 296(7), 435-447. doi:10.1016/j.ijmm.2006.05.001.
- 672 McClelland, M., Sanderson, K. E., Clifton, S. W., Latreille, P., Porwollik, S., Sabo, A., . . .  
673 Wilson, R. K. (2004). Comparison of genome degradation in Paratyphi A and Typhi,  
674 human-restricted serovars of *Salmonella enterica* that cause typhoid. *Nat Genet*,  
675 36(12), 1268-1274. Retrieved from 15531882
- 676 McDowell, M. A., Byrne, A. M., Mylona, E., Johnson, R., Sagfors, A., Crepin, V. F., . . .  
677 Frankel, G. (2019). The *S. Typhi* effector StoD is an E3/E4 ubiquitin ligase which  
678 binds K48- and K63-linked diubiquitin. *Life Sci Alliance*, 2(3).  
679 doi:10.26508/lsa.201800272
- 680 Noster, J., Chao, T. C., Sander, N., Schulte, M., Reuter, T., Hansmeier, N., & Hensel, M.  
681 (2019). Proteomics of intracellular *Salmonella enterica* reveals roles of *Salmonella*  
682 pathogenicity island 2 in metabolism and antioxidant defense. *PLoS Pathog*, 15(4),  
683 e1007741. doi:10.1371/journal.ppat.1007741
- 684 Obert, S., O'Connor, R. J., Schmid, S., & Hearing, P. (1994). The adenovirus E4-6/7 protein  
685 transactivates the E2 promoter by inducing dimerization of a heteromeric E2F  
686 complex. *Mol. Cell Biol.*, 14(2), 1333-1346. Retrieved from 8289811
- 687 Ochman, H., Soncini, F. C., Solomon, F., & Groisman, E. A. (1996). Identification of a  
688 pathogenicity island required for *Salmonella* survival in host cells. *Proc Natl Acad Sci*  
689 *U S A*, 93(15), 7800-7804. doi:10.1073/pnas.93.15.7800
- 690 Prouty, A. M., Schwesinger, W. H., & Gunn, J. S. (2002). Biofilm formation and interaction  
691 with the surfaces of gallstones by *Salmonella* spp. *Infect Immun*, 70(5), 2640-2649.  
692 doi:10.1128/iai.70.5.2640-2649.2002
- 693 Rajashekar, R., Liebl, D., Chikkaballi, D., Liss, V., & Hensel, M. (2014). Live cell imaging  
694 reveals novel functions of *Salmonella enterica* SPI2-T3SS effector proteins in  
695 remodeling of the host cell endosomal system. *PLoS One*, 9(12), e115423.  
696 doi:10.1371/journal.pone.0115423
- 697 Rajashekar, R., Liebl, D., Seitz, A., & Hensel, M. (2008). Dynamic remodeling of the  
698 endosomal system during formation of *Salmonella*-induced filaments by intracellular  
699 *Salmonella enterica*. *Traffic*, 9(12), 2100-2116. doi:TRA821 [pii] 10.1111/j.1600-  
700 0854.2008.00821.x
- 701 Röder, J., & Hensel, M. (2020). Presence of SopE and mode of infection result in increased  
702 *Salmonella*-containing vacuole damage and cytosolic release during host cell infection  
703 by *Salmonella enterica*. *Cell Microbiol*, 22(5), e13155. doi:10.1111/cmi.13155

09.01.2021

Typhoidal *Salmonella* single cell analyses

- 704 Saleh, S., Van Puyvelde, S., Staes, A., Timmerman, E., Barbe, B., Jacobs, J., . . .  
705 Deborggraeve, S. (2019). *Salmonella* Typhi, Paratyphi A, Enteritidis and  
706 Typhimurium core proteomes reveal differentially expressed proteins linked to the cell  
707 surface and pathogenicity. *PLoS Negl Trop Dis*, *13*(5), e0007416.  
708 doi:10.1371/journal.pntd.0007416
- 709 Schulte, M., Olschewski, K., & Hensel, M. (2020). Fluorescent protein-based reporters reveal  
710 stress response of intracellular *Salmonella enterica* at level of single bacterial cells.  
711 *Cell Microbiol, in revision*. doi:10.1111/cmi.13293
- 712 Schulte, M., Sterzenbach, T., Miskiewicz, K., Elpers, L., Hensel, M., & Hansmeier, N.  
713 (2019). A versatile remote control system for functional expression of bacterial  
714 virulence genes based on the *tetA* promoter. *Int J Med Microbiol*, *309*(1), 54-65.  
715 doi:10.1016/j.ijmm.2018.11.001
- 716 Sepe, L. P., Hartl, K., Iftekhar, A., Berger, H., Kumar, N., Goosmann, C., . . . Boccellato, F.  
717 (2020). Genotoxic effect of *Salmonella* Paratyphi A infection on human primary  
718 gallbladder cells. *mBio*, *11*(5). doi:10.1128/mBio.01911-20
- 719 Shea, J. E., Hensel, M., Gleeson, C., & Holden, D. W. (1996). Identification of a virulence  
720 locus encoding a second type III secretion system in *Salmonella typhimurium*. *Proc*  
721 *Natl Acad Sci U S A*, *93*(6), 2593-2597. doi:10.1073/pnas.93.6.2593
- 722 Sorensen, M., Lippuner, C., Kaiser, T., Misslitz, A., Aebischer, T., & Bumann, D. (2003).  
723 Rapidly maturing red fluorescent protein variants with strongly enhanced brightness in  
724 bacteria. *FEBS Lett*, *552*(2-3), 110-114. doi:10.1016/s0014-5793(03)00856-1
- 725 St-Pierre, F., Cui, L., Priest, D. G., Endy, D., Dodd, I. B., & Shearwin, K. E. (2013). One-step  
726 cloning and chromosomal integration of DNA. *ACS Synth Biol*, *2*(9), 537-541.  
727 doi:10.1021/sb400021j
- 728 Stapels, D. A. C., Hill, P. W. S., Westermann, A. J., Fisher, R. A., Thurston, T. L., Saliba, A.  
729 E., . . . Helaine, S. (2018). *Salmonella* persists undermine host immune defenses  
730 during antibiotic treatment. *Science*, *362*(6419), 1156-1160.  
731 doi:10.1126/science.aat7148
- 732 Stein, M. A., Leung, K. Y., Zwick, M., Garcia-del Portillo, F., & Finlay, B. B. (1996).  
733 Identification of a *Salmonella* virulence gene required for formation of filamentous  
734 structures containing lysosomal membrane glycoproteins within epithelial cells. *Mol*  
735 *Microbiol*, *20*(1), 151-164. doi:10.1111/j.1365-2958.1996.tb02497.x
- 736 Tomljenovic-Berube, A. M., Mulder, D. T., Whiteside, M. D., Brinkman, F. S., & Coombes,  
737 B. K. (2010). Identification of the regulatory logic controlling *Salmonella*  
738 pathoadaptation by the SsrA-SsrB two-component system. *PLoS Genet.*, *6*(3),  
739 e1000875. doi:10.1371/journal.pgen.1000875
- 740 Vorwerk, S., Krieger, V., Deiwick, J., Hensel, M., & Hansmeier, N. (2015). Proteomes of  
741 host cell membranes modified by intracellular activities of *Salmonella enterica*. *Mol*  
742 *Cell Proteomics*, *14*(1), 81-92. doi:10.1074/mcp.M114.041145
- 743 Walawalkar, Y. D., Vaidya, Y., & Nayak, V. (2016). Response of *Salmonella* Typhi to bile-  
744 generated oxidative stress: implication of quorum sensing and persister cell  
745 populations. *Pathog Dis*, *74*(8). doi:10.1093/femspd/ftw090

746

09.01.2021

Typhoidal *Salmonella* single cell analyses

747 **Tables**

748 Table 1. Bacterial strains used in this study

| 749 | <u>Designation</u>                     | <u>relevant characteristics</u> | <u>reference</u>                         |
|-----|----------------------------------------|---------------------------------|------------------------------------------|
| 750 | <i>S. enterica</i> serovar Typhimurium |                                 |                                          |
| 751 | NCTC12023                              | wild type                       | Lab collection                           |
| 752 | P2D6                                   | <i>ssaV::mTn5</i>               | (Shea et al., 1996)                      |
| 753 | MvP503                                 | $\Delta$ <i>sifA::FRT</i>       | (Kuhle & Hensel, 2002)                   |
| 754 | <i>S. enterica</i> serovar Typhi       |                                 |                                          |
| 755 | 120130191                              | wild type                       | clinical isolate, SalHostTrop consortium |
| 756 | STY101                                 | $\Delta$ <i>ssaR::aph</i>       | this study                               |
| 757 | STY118                                 | $\Delta$ <i>ssaR::FRT</i>       | this study                               |
| 758 | STY110                                 | $\Delta$ <i>sifA::aph</i>       | this study                               |
| 759 | STY123                                 | $\Delta$ <i>sifA::FRT</i>       | this study                               |
| 760 | STY132                                 | $\Delta$ <i>ssrB::aph</i>       | this study                               |
| 761 | STY134                                 | $\Delta$ <i>ssaK::aph</i>       | this study                               |
| 762 | STY137                                 | $\Delta$ <i>ssaK::FRT</i>       | this study                               |
| 763 | <i>S. enterica</i> serovar Paratyphi A |                                 |                                          |
| 764 | 45157                                  | wild type                       | clinical isolate, SalHostTrop consortium |
| 765 | SPA118                                 | $\Delta$ <i>ssaR::FRT</i>       | this study                               |
| 766 | SPA110                                 | $\Delta$ <i>sifA::aph</i>       | this study                               |
| 767 | SPA132                                 | $\Delta$ <i>ssrB::aph</i>       | this study                               |
| 768 |                                        |                                 |                                          |

09.01.2021

Typhoidal *Salmonella* single cell analyses

769 Table 2. Plasmids used in this study

| 770 | <u>Designation</u> | <u>relevant characteristics</u>                       | <u>reference</u>                               |
|-----|--------------------|-------------------------------------------------------|------------------------------------------------|
| 771 | pFPV-mCherry       | const. mCherry                                        | (Drecktrah et al., 2008)                       |
| 772 | pWRG167            | P <sub>EM7</sub> ::sfGFP in pWRG81                    | (Bender, Wille, Blank, Lange, & Gerlach, 2013) |
| 773 | pMW211             | const. DsRed T3_S4T                                   | (Sorensen et al., 2003)                        |
| 774 | pWRG730            | Red recombinase expression                            | (Hoffmann, Schmidt, Walter, Bender, &          |
| 775 |                    | Gerlach, 2017)                                        |                                                |
| 776 | pE-FLP             | FLP recombinase expression                            | (St-Pierre et al., 2013)                       |
| 777 | pGL-Rab7 wt        | Rab7a::GFP                                            | (Vorwerk, Krieger, Deiwick, Hensel, &          |
| 778 |                    | Hansmeier, 2015)                                      |                                                |
| 779 | p2095              | P <sub>ssaA</sub> sscB sseF::M45                      | (Hansen-Wester et al., 2002)                   |
| 780 | p2129              | P <sub>ssaJ</sub> sseJ::M45                           | (Hansen-Wester et al., 2002)                   |
| 781 |                    |                                                       |                                                |
| 782 | p2621              | P <sub>pipB2</sub> pipB2::M45                         | (Knodler et al., 2003)                         |
| 783 | p3301              | P <sub>ssaL</sub> sseL::HA                            | Lab collection                                 |
| 784 | p3774              | const. RFP                                            | Lab collection                                 |
| 785 | p3776              | P <sub>EM7</sub> ::RFP P <sub>ssaG</sub> ::sfGFP      | (Röder & Hensel, 2020)                         |
| 786 | p4514              | Arl8A::eGFP                                           | this study                                     |
| 787 | p4889              | P <sub>EM7</sub> ::DsRed P <sub>uhpT</sub> ::sfGFP    | (Röder & Hensel, 2020)                         |
| 788 | p4928              | P <sub>EM7</sub> ::RFP tetR P <sub>tetA</sub> ::sfGFP | (Schulte et al., 2019)                         |
| 789 |                    |                                                       |                                                |
| 790 |                    |                                                       |                                                |

09.01.2021

Typhoidal *Salmonella* single cell analyses

791 **Figure and Figure Legends**

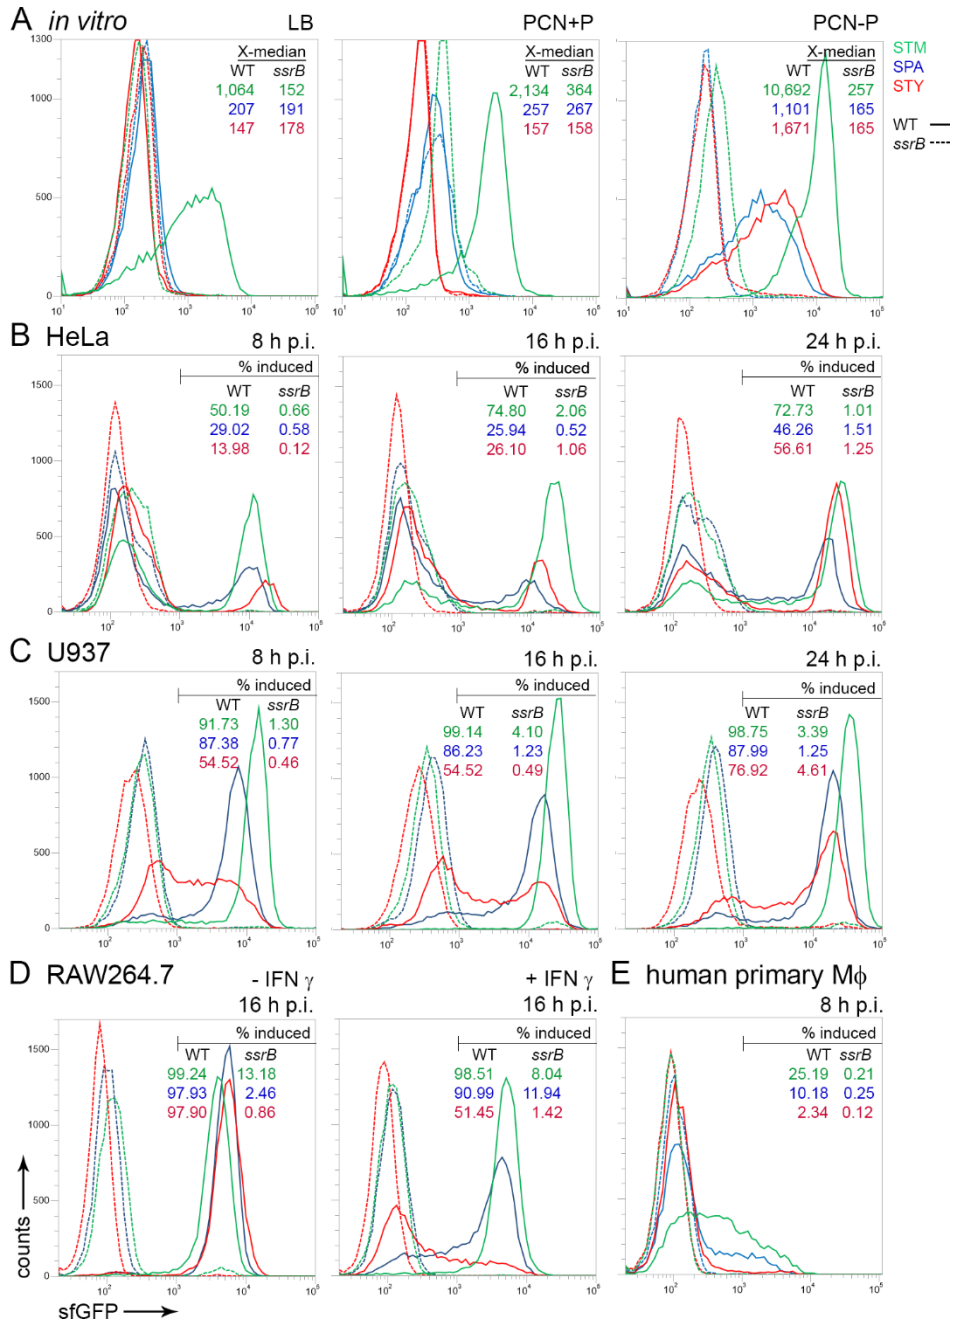

792

793 **Fig. 1. Expression of genes encoding the SPI2-T3SS by intracellular STM, SPA and STY.**

794 STM (green), SPA (blue), or STY (red) WT (solid lines) or *ssrB* mutant (dashed lines) strains

795 were used, all harboring plasmid p3776 for constitutive expression of DsRed, and sfGFP under

796 control of the *ssaG* promoter. **A)** Various strains were grown in non-inducing PCN medium

797 (PCN pH 7.4, 25 mM Pi), or inducing PCN medium (PCN pH 5.8, 0.4 mM Pi). After culture

798 o/n with aeration by rotation at 60 rpm in a roller drum, aliquots of cultures were fixed, and

09.01.2021

Typhoidal *Salmonella* single cell analyses

799 bacteria were analyzed by flow cytometry (FC). The x -median values for the sfGFP-positive  
800 bacteria are indicated. Various strains were used to infect HeLa cells (**B**), U937 macrophages  
801 (**C**), RAW264.7 macrophages (**D**) without or with activation by  $\gamma$ -interferon (IFN  $\gamma$ ), or human  
802 primary macrophages (**E**). At 8 h, 16 h, or 24 h p.i. as indicated, host cells were lysed in order  
803 to release bacteria. For FC, at least 10,000 bacteria-sized particles with DsRed fluorescence  
804 were gated and GFP intensities were quantified. The percentage of intracellular bacteria with  
805 induction of  $P_{ssaG}::sfGFP$  is indicated for WT and  $\Delta ssrB$  strains. The data set shown is  
806 representative for three independent experiments with similar outcome.  
807



09.01.2021

Typhoidal *Salmonella* single cell analyses

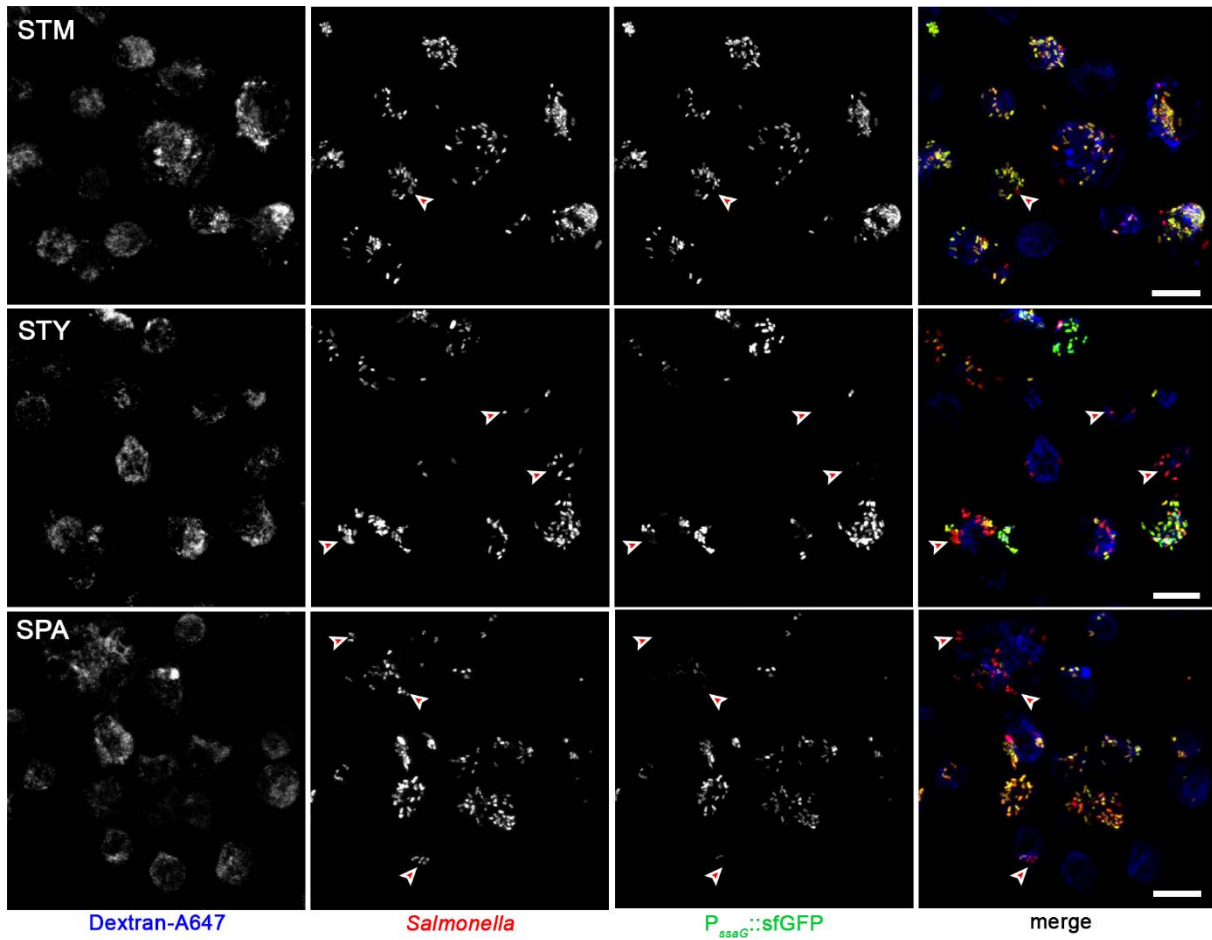

**Fig. 2. Heterogeneity of  $P_{ssaG}$  induction by intracellular STM, SPA and STY.** U937 cells were infected at MOI 50 with STM, STY, or SPA WT strains all harboring plasmid p3776 for constitutive expression of RFP (red), and sfGFP (green) under control of the *ssaG* promoter. To label the endosomal system, cells were pulsed with dextran-Alexa647 (dextran-A647, blue) from 1 h p.i. until fixation. Cells were fixed with PFA 8 h p.i. and microscopy was performed by CLSM on a Leica SP5 using a 40x objective. Red arrowheads indicate representative,  $P_{ssaG}::sfGFP$ -negative intracellular *Salmonella*. Scale bars: 10  $\mu$ m.

09.01.2021

Typhoidal *Salmonella* single cell analyses

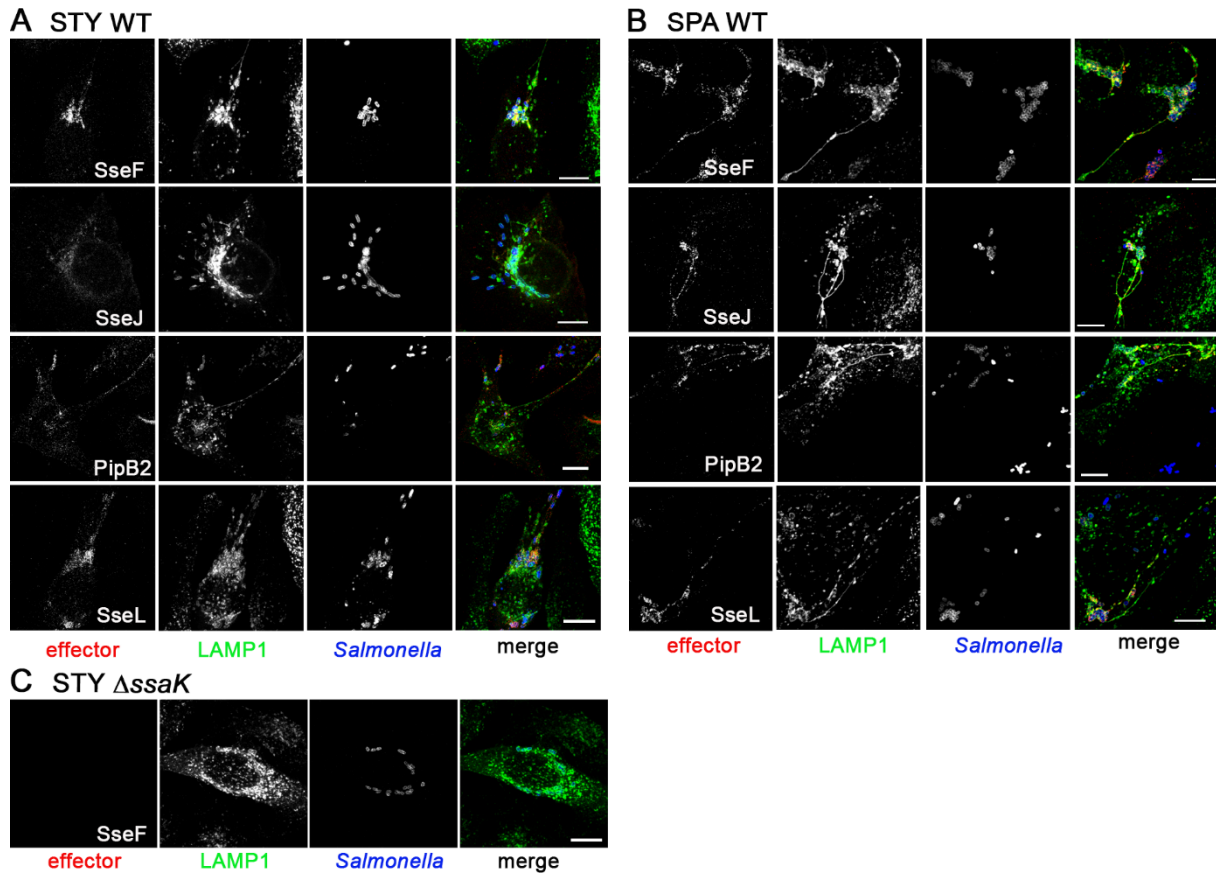

817

818 **Fig. 3. The SPI2-T3SS of SPA and STY is functional in translocation of effector proteins.**

819 HeLa cells constitutively expressing LAMP1-GFP (green) were infected with STY WT (A) or  
820 SPA WT (B) harboring plasmids for expression of *sseF*::M45, *sseJ*::M45, *pipB2*::M45, or  
821 *sseL*::HA as indicated. At 9 h p.i., cells were fixed, permeabilized by Saponin and  
822 immunolabeled for M45 or HA epitope tags (red) to localize translocated effector proteins, and  
823 with serovar-specific anti O-Ag antibodies to label bacteria (blue). C) Micrographs of cells  
824 infected with SPI2-T3SS-deficient STY strain  $\Delta$ ssaK harboring a plasmid for expression of  
825 *sseF*::M45. Microscopy was performed by CLSM using a Leica SP5 with 100x objective. Scale  
826 bars: 10  $\mu$ m.

827

09.01.2021

Typhoidal *Salmonella* single cell analyses

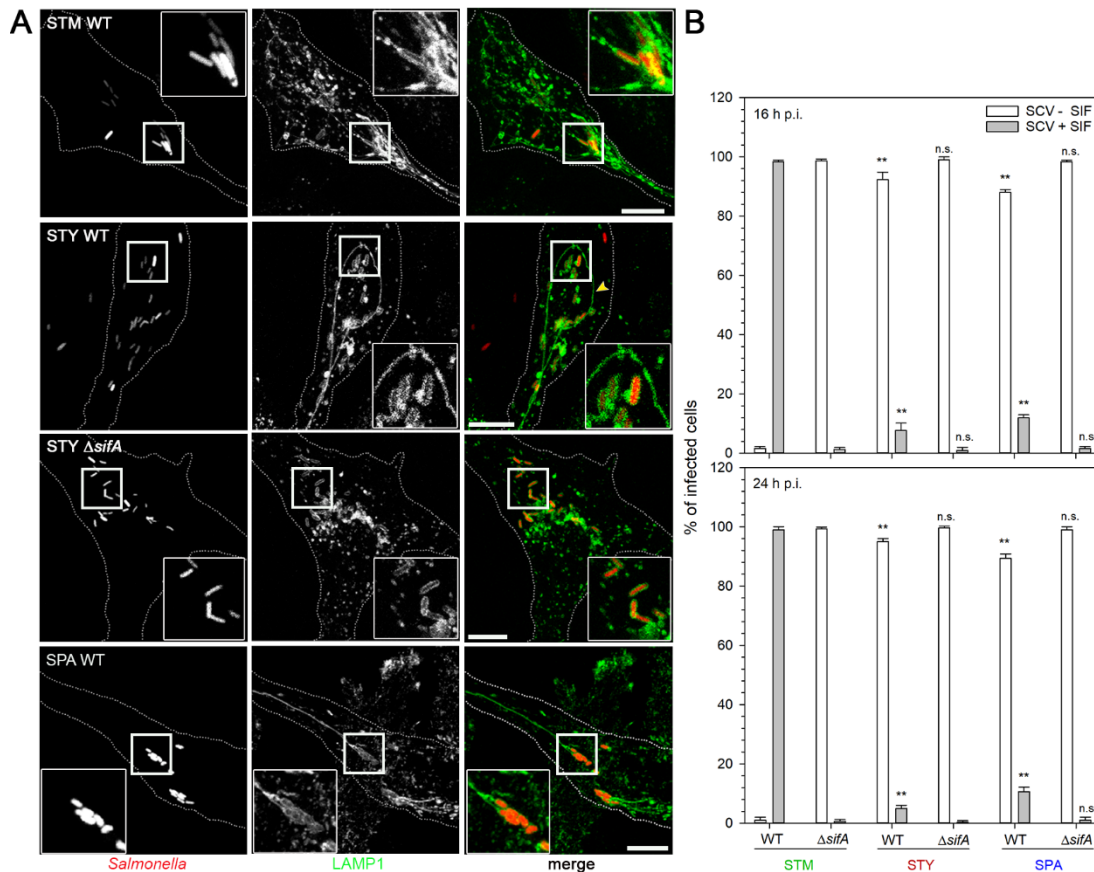

828

829 **Fig. 4. Endosomal remodeling in host cells infected with STM, SPA, or STY is dependent**

830 **on function of SifA. A)** HeLa LAMP1-GFP cells were infected with WT or  $\Delta sifA$  strains of

831 STM, STY or SPA as indicated, constitutively expression mCherry (red) at MOI 50. Cells were

832 fixed at 8 h p.i. and microscopy was performed by CLSM on a Leica SP5 using a 40x objective.

833 Scale bar, 10  $\mu$ m. **B)** Quantification of SIF formation in HeLa cell infected by STM, STY, or

834 SPA. HeLa LAMP1-GFP cells were infected with WT or *sifA* mutant strains of STM, STY, or

835 SPA at MOI 50. Cell were fixed 16 or 24 h p.i., and microscopy was performed with CLSM

836 using a Leica SP5 with 40x objective. At least 100 cells per strain and time point were counted,

837 and infected cells were scored for appearance of SIF. Statistical analysis was performed by

838 One-way ANOVA and are indicated as follows: n.s., not significant; \*,  $P < 0.05$ ; \*\*,  $P < 0.001$ .

839

09.01.2021

Typhoidal *Salmonella* single cell analyses

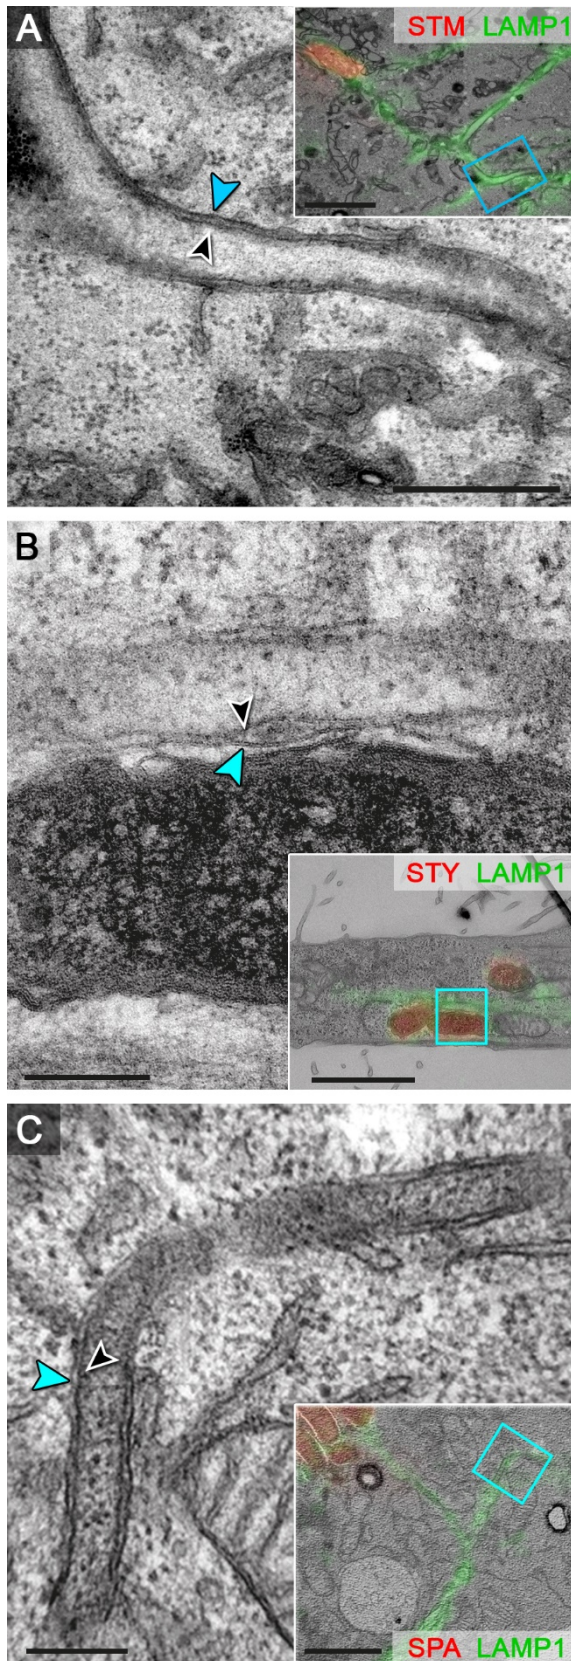

840

841 **Fig. 5. Ultrastructure of endosomal compartments remodeled by intracellular STM, STY,**

842 **or SPA. HeLa cells expressing LAMP1-GFP (green) were infected with STM (A), STY (B),**

09.01.2021

Typhoidal *Salmonella* single cell analyses

843 or SPA (C) WT, each expressing mCherry (red). Cell were fixed 7 h p.i. and processed for  
844 confocal fluorescence microscopy (FM) and transmission electron microscopy (TEM) of  
845 ultrathin sections. FM and TEM modalities were superimposed (inserts) for correlation, and  
846 details of the ultrastructure of tubular LAMP1-positive membrane compartment are shown at  
847 higher magnification. Double membrane SIF with inner (black arrowhead) and outer (blue  
848 arrowhead) membrane. Scale bars: 200 nm (details), 2  $\mu$ m (inserts for overview).

849

09.01.2021

Typhoidal *Salmonella* single cell analyses

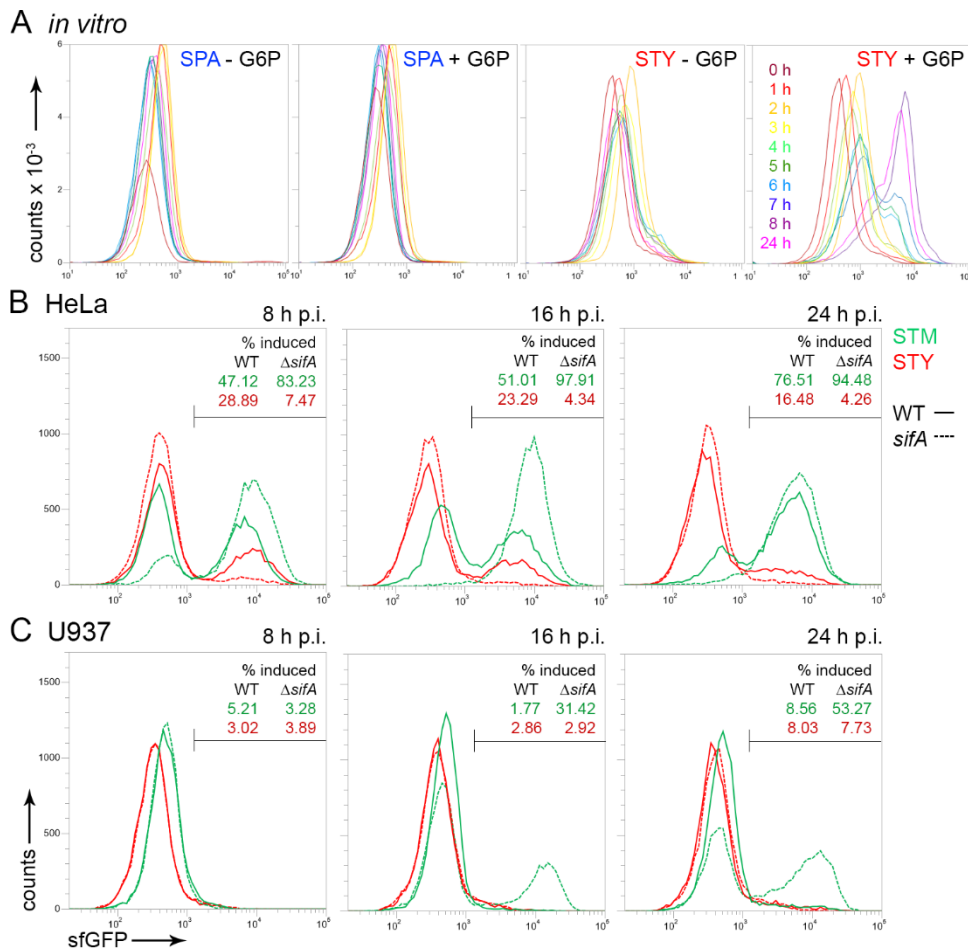

850

851 **Fig. 6. SCV integrity and cytosolic release of STM and STY.** STM (green), SPA (blue), or  
 852 STY (red), WT (solid lines) or  $\Delta sifA$  (dashed lines) strains were used as indicated, each  
 853 harboring plasmid p4889 for constitutive expression of DsRed, and  $P_{uhpT}$ -controlled expression  
 854 of sfGFP as sensor for cytosolic exposure. **A)** Induction of  $P_{uhpT}::sfGFP$  by glucose-6-phosphate  
 855 (G6P) in SPA and STY. SPA or STY WT harboring p4889 were grown in LB broth without or  
 856 with addition of 0.2% G6P. Samples were collected at various time points of subculture as  
 857 indicated by various colors. Bacteria constitutively expressing DsRed were analysed by FC for  
 858 levels of sfGFP expression. **B, C)** WT (solid lines) or  $sifA$  mutant (dashed lines) strains of STM  
 859 (green) or STY (red), each harboring plasmid p4889 were used to infect HeLa cells (**B**), or  
 860 U937 cells (**C**). At 8 h, 16 h, or 24 h p.i. as indicated, host cells were lysed in order to release  
 861 bacteria. For FC, at least 10,000 bacteria-sized particles with DsRed fluorescence were gated  
 862 and the GFP intensity was quantified. The percentage of bacterial cells with induction of

09.01.2021

Typhoidal *Salmonella* single cell analyses

863  $P_{uphT}::sfGFP$  is indicated for WT and *sifA* mutant strains. The data sets shown are representative

864 for three independent experiments with similar outcome.

865

09.01.2021

Typhoidal *Salmonella* single cell analyses

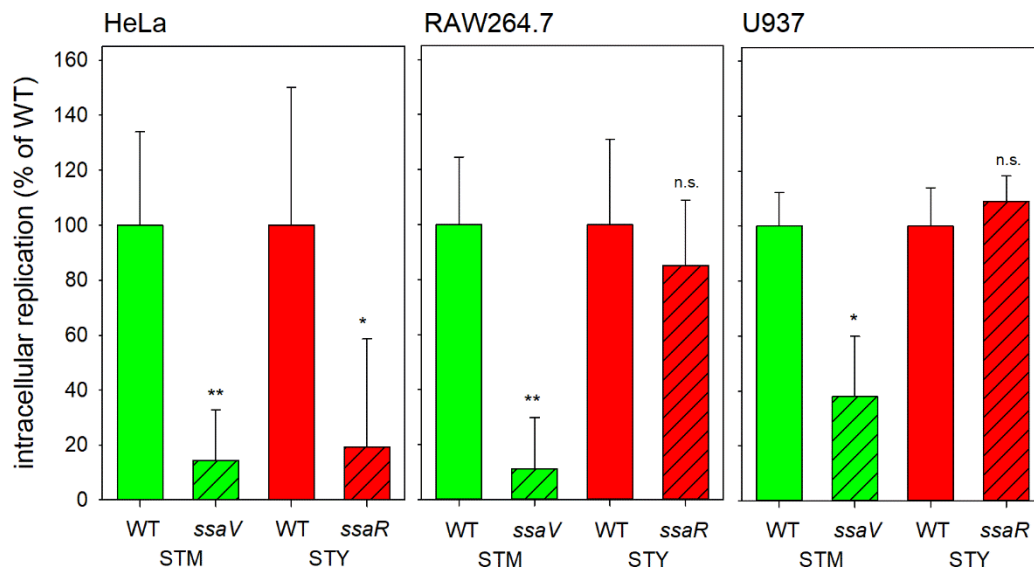

866

867 **Fig. 7. SPI2-T3SS-deficient STY are reduced in intracellular replication in HeLa cells.**

868 Hosts cells were infected with WT (open bars) or SPI2-T3SS-deficient (hatched bars, *ssaV* and  
869 *ssaR* encode subunits of the SPI2-T3SS) strains of STM (green) or STY (red) at MOI 1.

870 Intracellular replication was determined by gentamicin protection assays comparing  
871 intracellular CFU recovered 1 h p.i. and 24 h p.i. **A)** Intracellular replication in HeLa cells. STM

872 was cultured overnight, diluted 1:31 in fresh LB broth, subcultured 2.5 h, and used for infection.

873 STY was incubated in 3 ml LB broth for 8 h, reinoculated 1:100 in 10 ml fresh LB broth and  
874 grown for 16 h under microaerophilic conditions before use as inoculum in infection **B, C)**

875 Bacterial strains were grown overnight in LB and aliquots were used to infect macrophages. **B)**

876 Intracellular replication of STM and STY in RAW264.7 macrophages. **C)** Intracellular

877 replication of STM and STY in U937 cells. Assays were performed in three biological

878 replicates, and one representative assay is shown. Student's *t*-test was used for statistical

879 analysis and significance is indicated as follows: n.s., not significant; \*,  $P > 0.05$ ; \*\*,  $P > 0.01$ .

880



09.01.2021

Typhoidal *Salmonella* single cell analyses

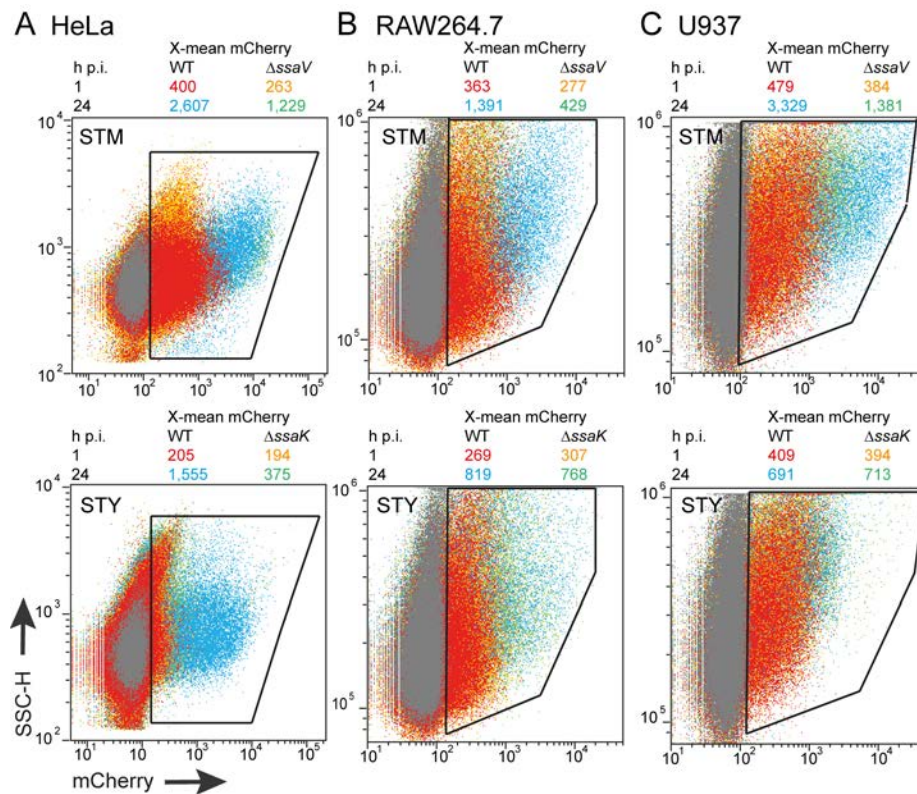

881

882 **Fig. 8. Intracellular proliferation of STM and STY in HeLa cells, RAW264.7**

883 **macrophages, or U937 macrophages determined flow cytometry.** For infection of HeLa

884 cells (A) STM was cultured overnight in 3 ml LB broth and reinoculated 1:31 in fresh LB broth

885 for 3.5 h. STY was incubated in 3 ml LB broth for 8 h and reinoculated 1:100 in 10 ml fresh

886 LB broth for 16 h under microaerophilic conditions. For infection of RAW264.7 macrophages

887 (B), or U937 macrophages (C), overnight cultures were used. At 1 h or 24 h p.i. as indicated,

888 cells were washed, fixed and detached. The cell populations were analysed by flow cytometry

889 and gating was set to cells harboring intracellular *Salmonella* as indicated by polygons. At least

890 10,000 *Salmonella*-infected host cells were scored. Overlays of dot plots show WT *Salmonella*

891 at 1 h or 24 h p.i. in red and blue, respectively, and  $\Delta$ ssaV/ $\Delta$ ssaK *Salmonella* at 1 h or 24 h p.i.

892 in orange and green, respectively. The X-mean values for mCherry fluorescence intensities of

893 infected cells are shown in same colors above each overlay. Individual dot plots are shown in

894 **Fig. S 7.** Assays were performed in three biological replicates, one representative replicate is

895 shown.

09.01.2021

Typhoidal *Salmonella* single cell analyses

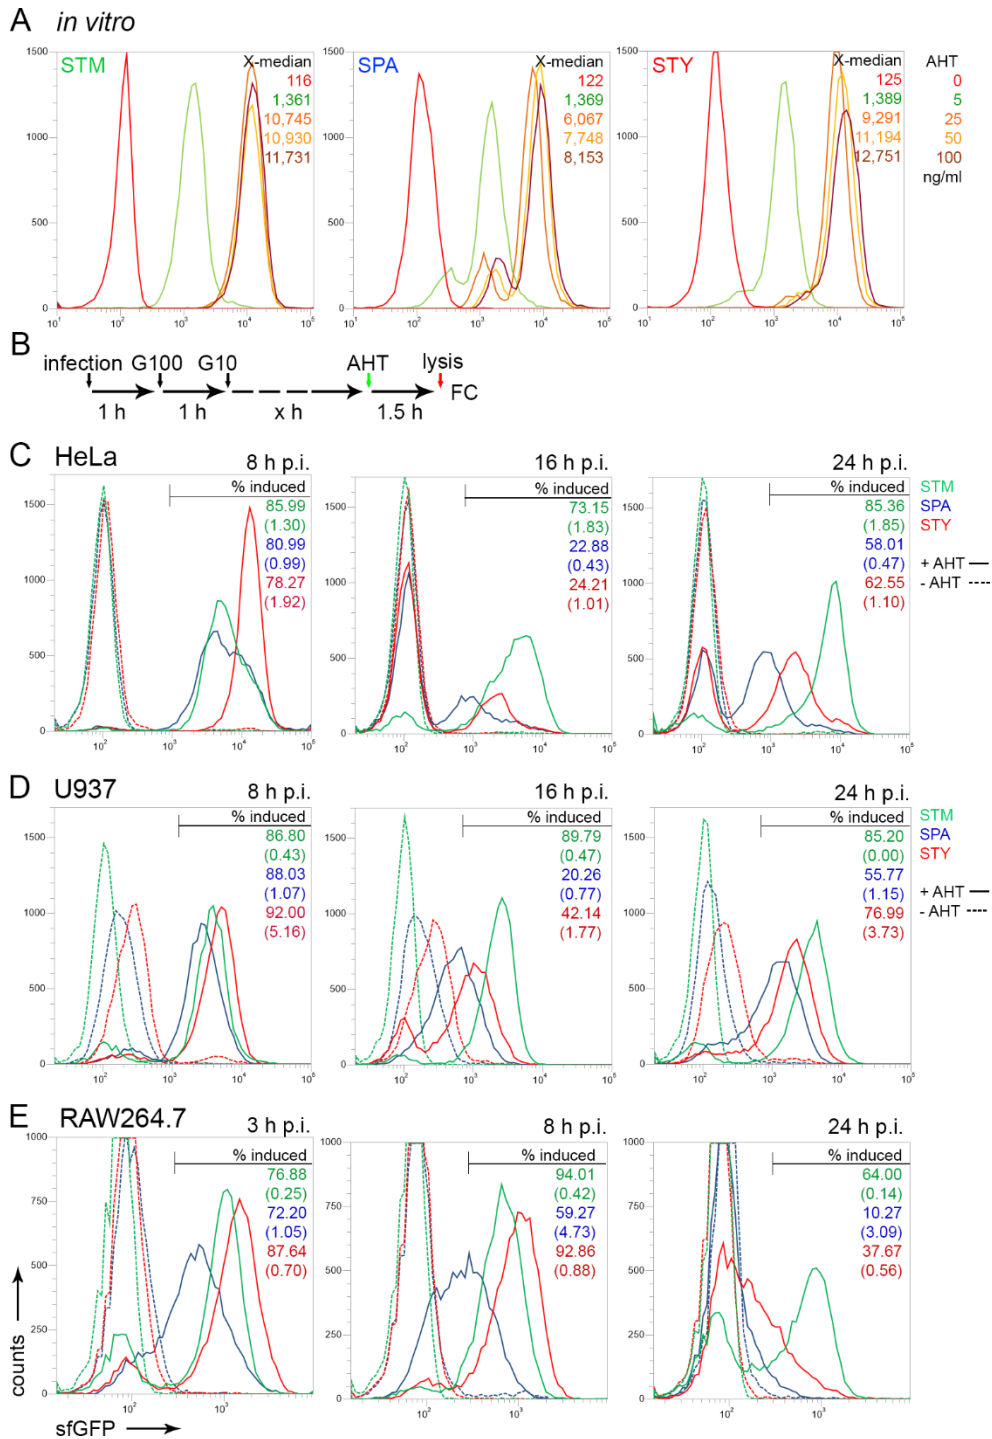

896

897 **Fig. 9. Biosynthetic capability of intracellular STM, SPA and STY.** A) STM (green), SPA  
 898 (blue), and STY (red) WT strains, each harboring plasmid p4928 for constitutive expression of  
 899 RFP, and sfGFP under control of the *tetA* promoter were subcultured in LB broth with aeration  
 900 by rotation at 60 rpm in der roller drum. Various amounts of AHT as indicated were added after  
 901 1.5 h of culture. Culture was continued for 2 h, bacterial cells were fixed and the sfGFP  
 902 fluorescence intensity was determined by FC for at least 50,000 DsRed-positive bacteria per

09.01.2021

Typhoidal *Salmonella* single cell analyses

903 condition. The X-median values are shown for a representative experiment. **B)** STM, SPA, or  
904 STY WT strains harboring p4928 were used to infect HeLa cells (**C**), U937 cells (**D**), or  
905 RAW264.7 cells (**E**). After infection for 1 h, medium was exchanged against medium  
906 containing 100  $\mu\text{g} \times \text{ml}^{-1}$  gentamicin (G100) for 1 h, followed by medium containing 10  $\mu\text{g} \times$   
907  $\text{ml}^{-1}$  gentamicin for the rest of the experiment. For induction of sfGFP expression, 50  $\text{ng} \times \text{ml}^{-1}$   
908 AHT was added to infected cells 1.5 h prior lysis of host cells. At the time points p.i. indicated,  
909 host cells were lysed in order to release intracellular bacteria. For FC, at least 10,000 bacteria-  
910 sized particles were gated based on DsRed fluorescence, and the sfGFP intensity was  
911 quantified. The percentage of sfGFP-positive bacteria is indicated and values in brackets show  
912 the non-induced controls. The data sets shown are representative for three independent  
913 experiments with similar outcome.

914

09.01.2021

Typhoidal *Salmonella* single cell analyses

915 **Suppl. Tables**

916 Table S 1. Oligonucleotides used in this study

917 Designation                      Sequence 5' – 3'

918 Red mutagenesis primer

919 ssaK-Del13-For      TCTTCATGGAGCATTGCTATGAGTTTTACTTCACTTC

920 TATCCGGGGATCCGTCGACC

921 ssaK-Del13-Rev      CATTACGTAACCATTTCAGTAACGCGTTGAAATGACGAG

922 ATGTAGGCTGGAGCTGCTTCG

923 ssaR Del13 For      ATAATAGCGTTCCAGGTCGTGTCATGAGAGATAC

924 AGTATGATTCCGGGGATCCGTCGACC

925 ssaR Del13 Rev      GAATCATTCATGAAAAGCTCTGTACCAATTGCGCC

926 AGTGTTGTAGGCTGGAGCTGCTTCG

927 STY ssaB Del13 For ATATTATCTTAATTTTCGCGAGGGCAGCAAATGAAAGAA

928 ATTCCGGGGATCCGTCGACC

929 STY ssaB Del13 Rev ACCAATGCTTAATACCATCGGATGCCCTGGTTAATAATAT

930 GTAGGCTGGAGCTGCTTCG

931 Check PCR primer

932 ssaK-DelCheck-For      CGTATACTTTGGCCGAAGAC

933 ssaK-DelCheck-Rev      TCCTGTAACCTCTGGAGAGC

934 ssaR DelCheck For      TGGTGCATATTACACGTTGG

935 ssaR DelCheck Rev      TGAGTCAAGGCCTGAACAAG

936 STY ssaR DelCheck For      CCCACAGGCAATCAACTCAC

937 STY-ssaR-DelCheck-Rev2 GTGAGTTGATTGCCTGTGGG

938 STY ssaB DelCheck For      GGGCAGACTGAATTGGTATG

939 STY ssaB DelCheck Rev      TAGCGTGGCGGCATTGATAC

940

09.01.2021

Typhoidal *Salmonella* single cell analyses

941 Table S 2. Antisera and antibodies used in this study

| 942 | <u>Antibody or antiserum</u> | <u>Characteristics</u>        | <u>Source or reference</u> |
|-----|------------------------------|-------------------------------|----------------------------|
| 943 | Group B Factors 1, 4, 5, 12  | Rabbit anti-STM O antiserum   | BD Difco                   |
| 944 | Group D1 Factors 1,9,12      | Rabbit anti-STY O antiserum   | BD Difco                   |
| 945 | Group A Factors 1,2,12       | Rabbit anti-SPA O antiserum   | BD Difco                   |
| 946 | Anti-M45                     | Mouse anti-M45 epitope tag    | (Obert, O'Connor, Schmid,  |
| 947 | & Hearing, 1994)             |                               |                            |
| 948 | Anti-HA                      | Rat anti-HA epitope tag       | Roche                      |
| 949 | Anti-mouse IgG Alexa 568     | Goat anti-mouse IgG Alexa 568 | Thermo Fischer             |
| 950 | Anti-rat IgG Alexa 568       | Goat anti-rat IgG Alexa 568   | Thermo Fischer             |
| 951 | Anti-rabbit IgG Cy5          | Goat anti-rabbit IgG Cy5      | Jackson ImmunoResearch     |
| 952 | Anti-rat IgG Cy5             | Goat anti-rat IgG Cy5         | Jackson ImmunoResearch     |

953

09.01.2021

Typhoidal *Salmonella* single cell analyses

954 **Suppl. Figure and Figure Legends**

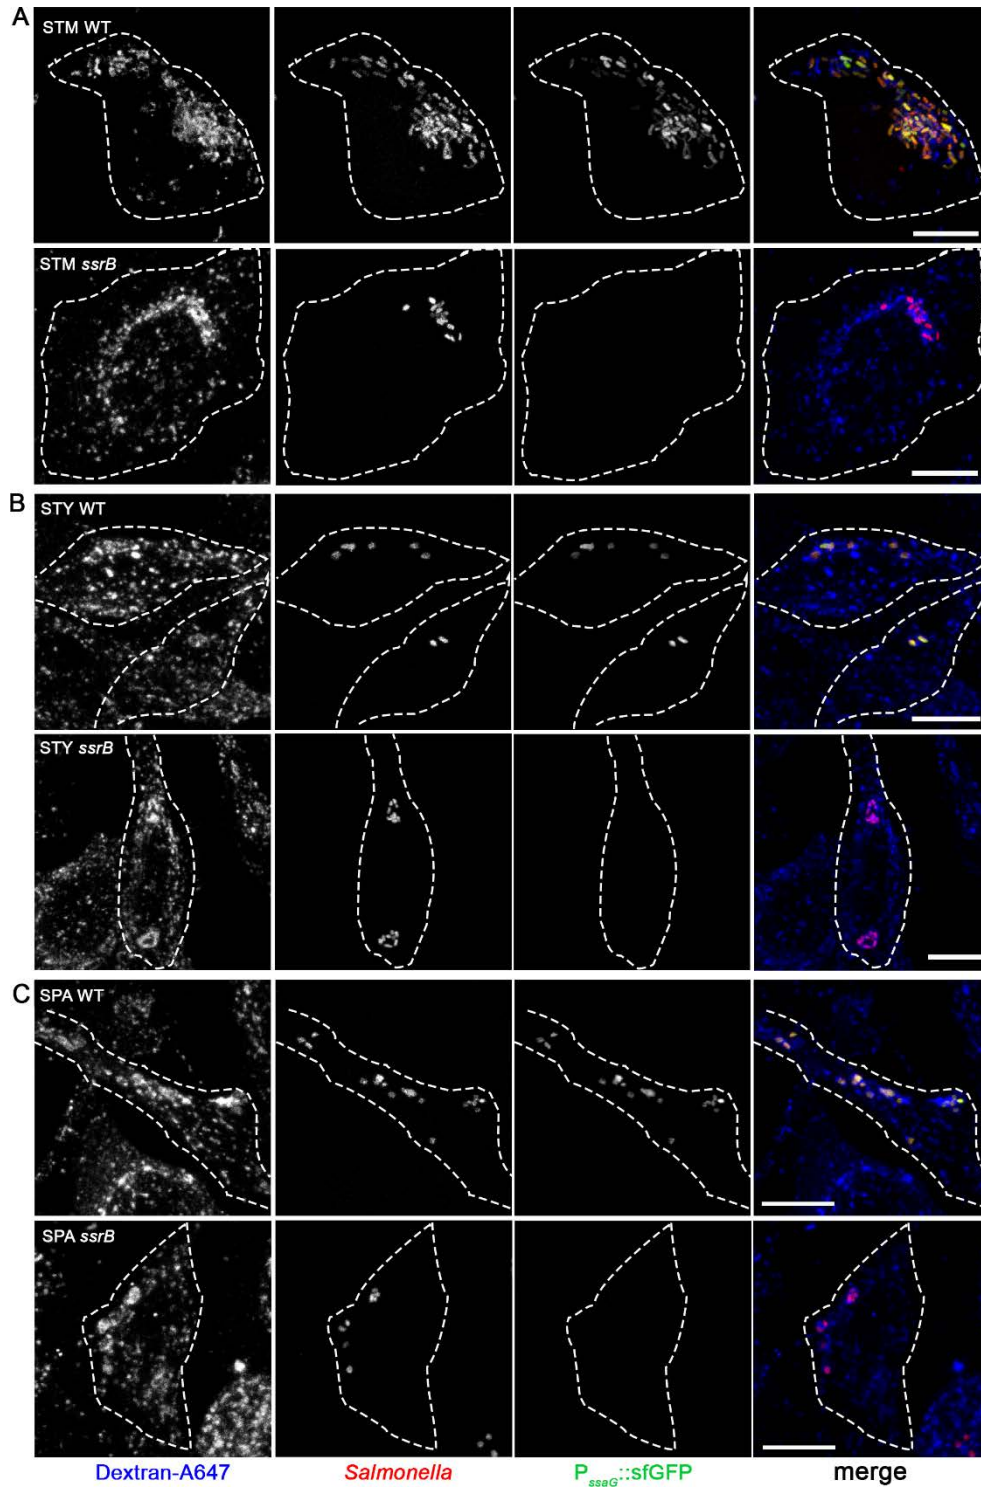

956 **Fig. S 1. Induction of P<sub>ssaG</sub> by intracellular STM, STY or SPA.** HeLa cells were infected at  
957 MOI 75 with STM (A), STY (B), or SPA (C), WT or  $\Delta ssrB$  strains all harboring plasmid p3776  
958 for constitutive expression of RFP (red), and sfGFP (green) under control of the *ssaG* promoter.

09.01.2021

Typhoidal *Salmonella* single cell analyses

959 To label the endosomal system, cells were pulsed with dextran-Alexa647 (dextran-A647, blue)

960 from 1 h p.i. until fixation. Cells were fixed with PFA 8 h p.i. and microscopy was performed

961 by CLSM on a Leica SP5 using the 100x objective. Scale bars, 10  $\mu$ m

962

09.01.2021

Typhoidal *Salmonella* single cell analyses

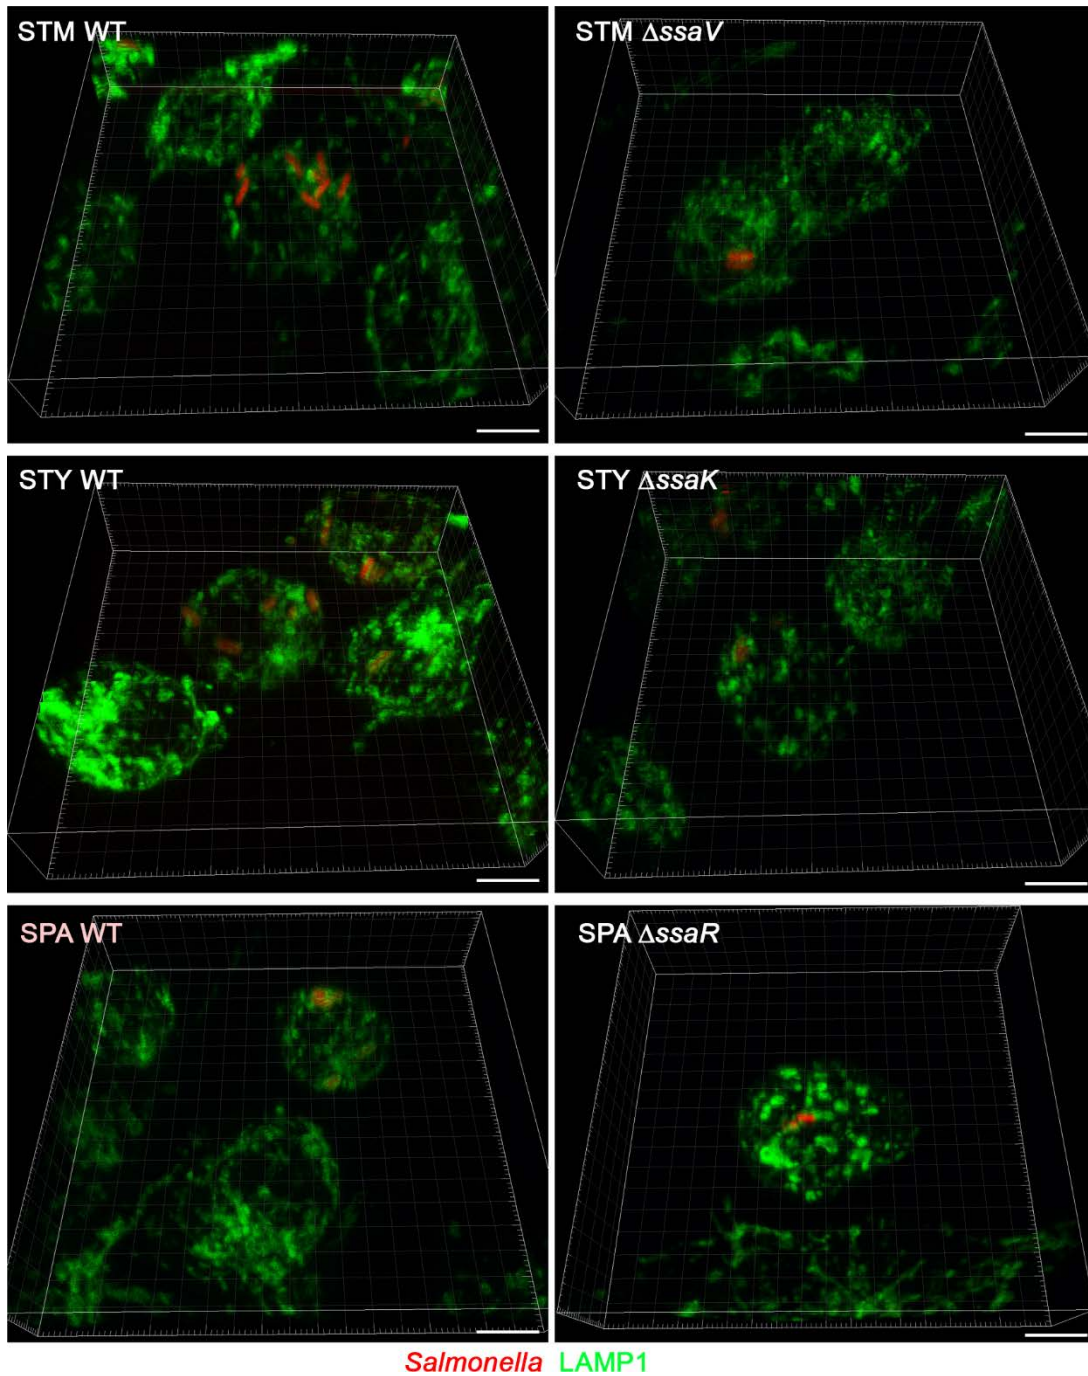

963

964 **Fig. S 2. Formation of SCV in RAW264.7 macrophages infected with STM, STY, or SPA**

965 **cells compared to STM.** RAW264.7 cells constitutively expressing LAMP1-GFP were

966 infected by WT or SPI2-T3SS-deficient strains ( $\Delta$ ssaV,  $\Delta$ ssaK, or  $\Delta$ ssaV) of STM, STY, or

967 SPA as indicated, each constitutively expressing mCherry. Cells were fixed 8 h p.i. and

968 subjected to CLSM on a Leica SP5. 3D reconstructions of Z stacks are shown. Scale bars, 5  $\mu$ m.

969



09.01.2021

Typhoidal *Salmonella* single cell analyses

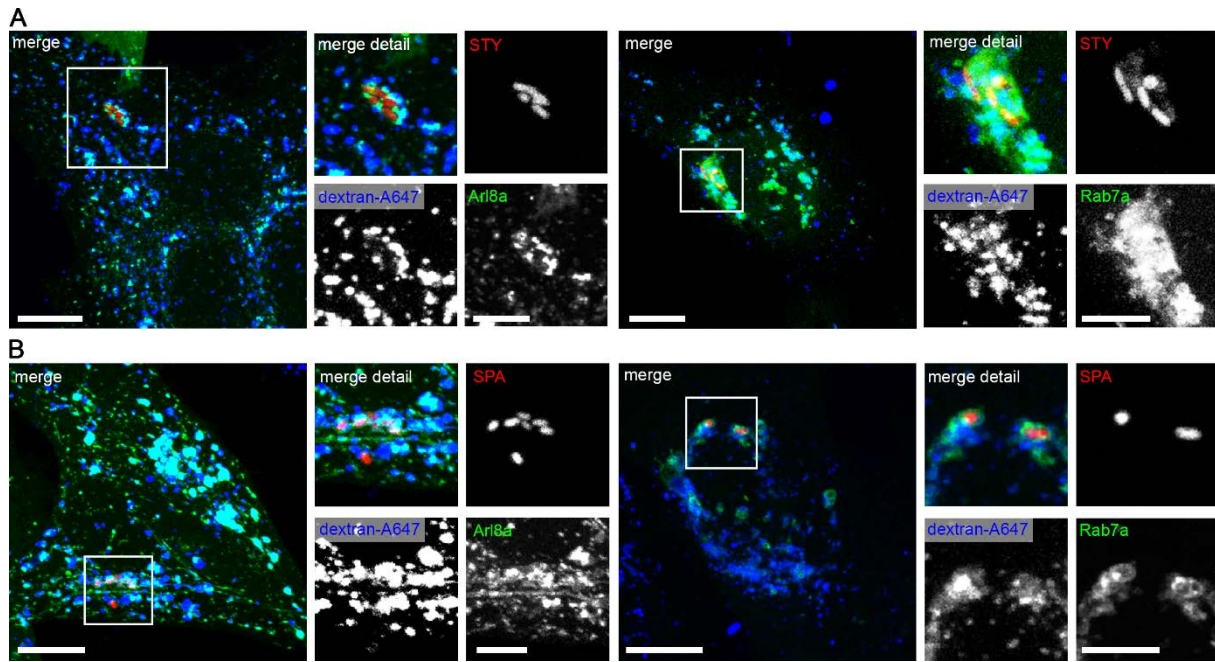

970

971 **Fig. S 3. Vesicular compartments harboring STY or SPA are positive for canonical SCV**  
972 **markers Arl8A and Rab7.** HeLa cells were transiently transfected with plasmids for the  
973 expression of Arl8A-eGFP or Rab7A-eGFP as indicated, and infected with STY (A) or SPA  
974 (B) at MOI 75 (for STY) or 50 (for SPA). Infected cells were pulsed-chased with Dextran-  
975 Alexa647 from 1 h p.i. until fixation. Microscopy was performed by CLSM on a Leica SP5  
976 using a 100 x objective. Scale bars, 10  $\mu$ m (overview); 5  $\mu$ m (detail).

977

09.01.2021

Typhoidal *Salmonella* single cell analyses

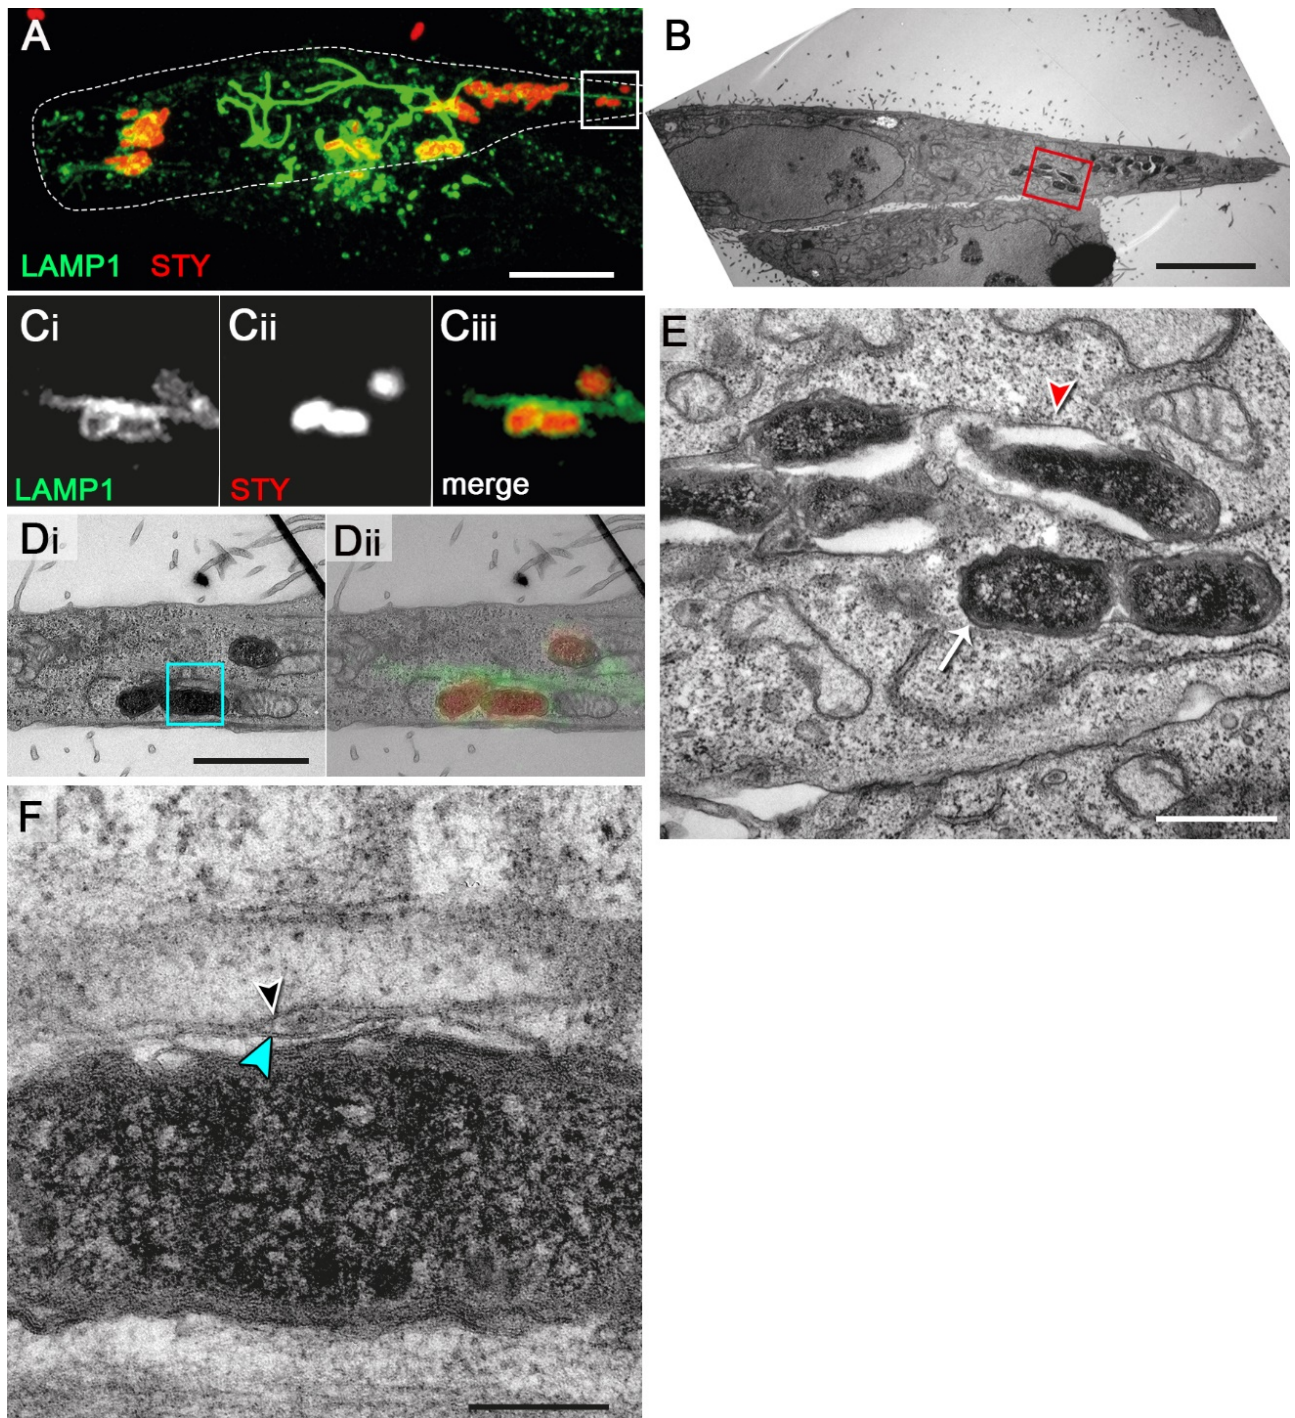

978

979 **Fig. S 4. CLEM of intracellular STM.** HeLa cells expressing LAMP1-GFP (green) were  
980 infected with STM WT expressing mCherry (red). Cells were fixed 7 h p.i. and processed for  
981 confocal microscopy (**A, C**) and TEM of ultrathin sections (**B, D, E, F, G**). **A**) An infected cell  
982 showing a distinct LAMP1-GFP-positive SIF network was identified and further analyzed  
983 (maximum intensity projection, MIP). **B**) TEM overview image of a host cell harboring several  
984 salmonellae. **Ci, ii, iii, Di, ii**) For correlation, TEM and CLSM images were superimposed. **E**)

09.01.2021

Typhoidal *Salmonella* single cell analyses

985 Detail of individual STM cells in SCV with single membrane (red arrowhead, white arrow). **F**,  
986 **G**) Detail views of small sections of double membrane SIF with inner (black arrowhead) and  
987 outer (blue arrowhead) membrane. Scale bars: 10  $\mu\text{m}$  (**A**), 7  $\mu\text{m}$  (**B**), 2  $\mu\text{m}$  (**D**), 750 nm (**E**),  
988 200 nm (**F**).  
989

09.01.2021

Typhoidal *Salmonella* single cell analyses

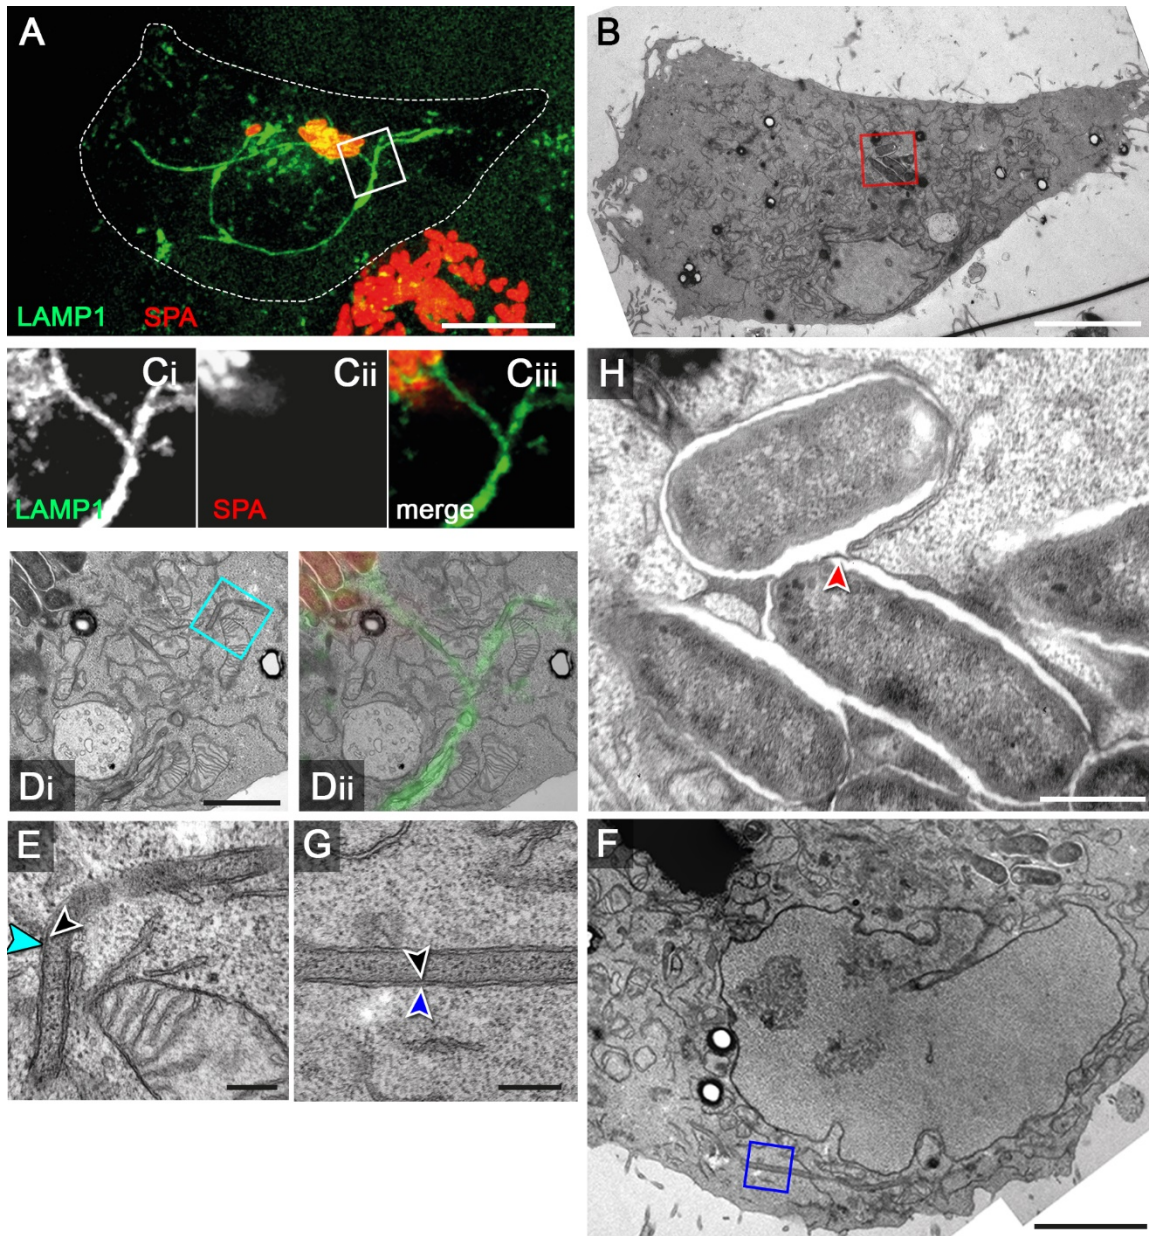

990

991 **Fig. S 5. CLEM of intracellular STY.** HeLa cells expressing LAMP1-GFP (green) were  
992 infected with STY WT expressing mCherry (red). Cells were fixed 7 h p.i. and processed for  
993 confocal microscopy (A, C) and TEM of ultrathin sections (B, D, E, F). A) An infected cell  
994 showing a distinct LAMP1-GFP-positive SIF network was identified and further analyzed  
995 (MIP). B) TEM overview image of a host cell harboring several salmonellae. Ci, ii, iii, Di, ii)  
996 For correlation, TEM and CLSM images were superimposed. E) Detail of individual STY cells  
997 in SCV with single membrane (red arrowhead, white arrow). F) Detail view of a small section

09.01.2021

Typhoidal *Salmonella* single cell analyses

998 of a double membrane SIF with inner (black arrowhead) and outer (blue arrowhead) membrane.

999 Scale bars: 10  $\mu\text{m}$  (**A**), 7  $\mu\text{m}$  (**B**), 2  $\mu\text{m}$  (**D**), 750 nm (**E**), 200 nm (**F**).

1000

09.01.2021

Typhoidal *Salmonella* single cell analyses

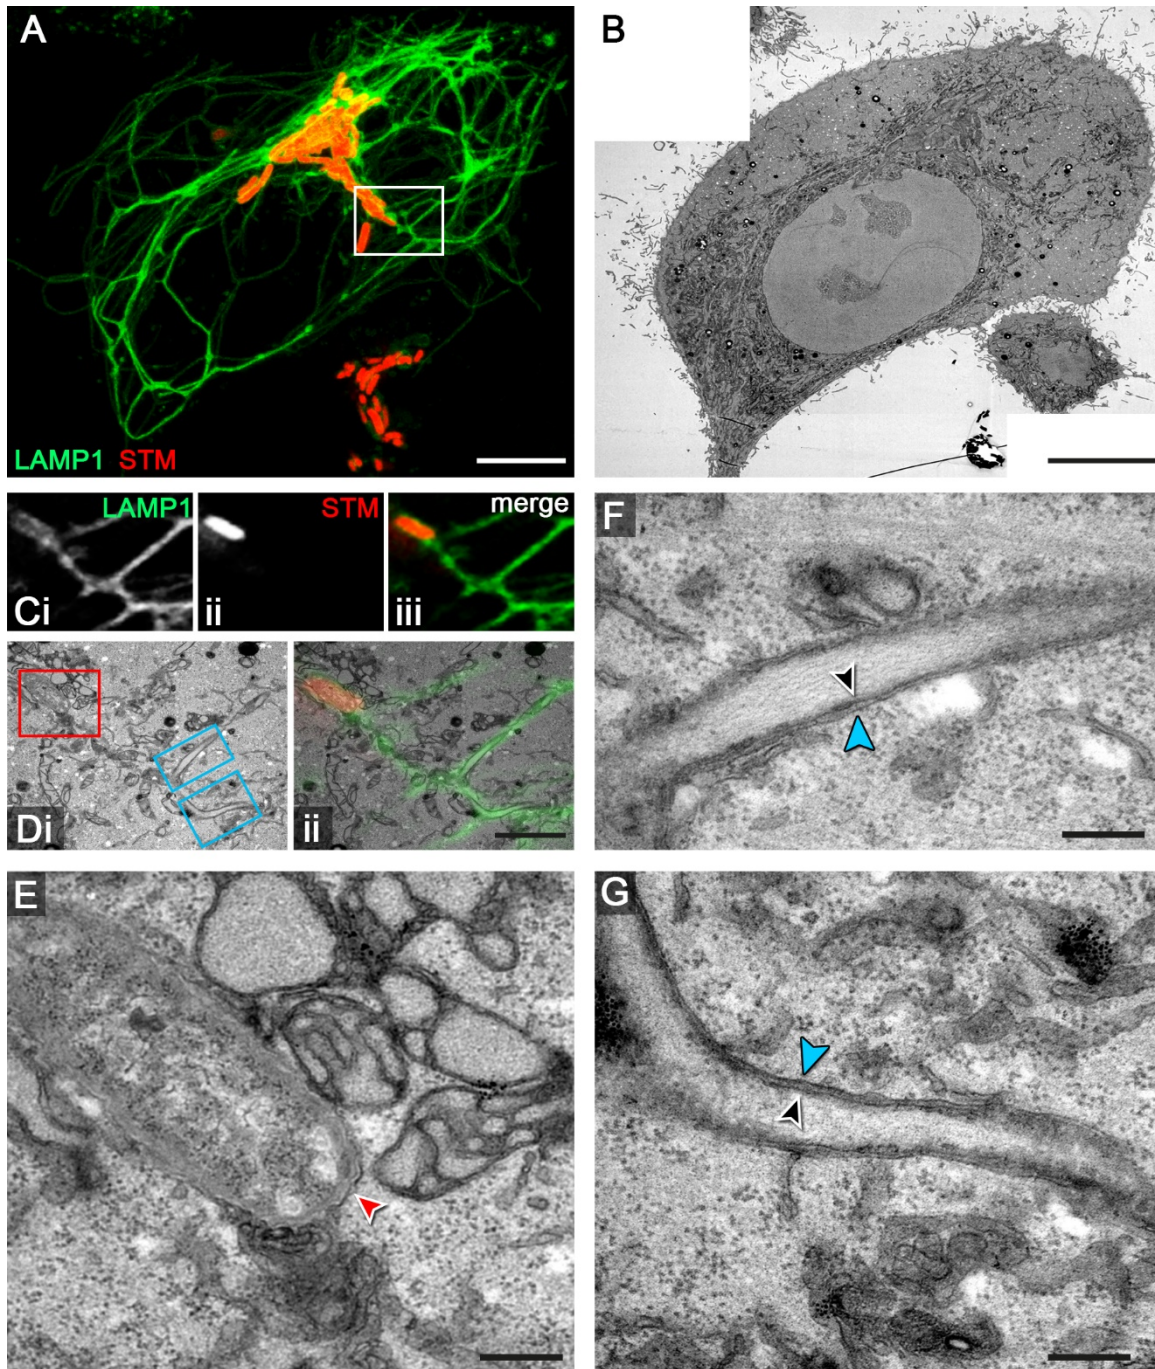

1001

1002 **Fig. S 6. CLEM of intracellular SPA.** HeLa cells expressing LAMP1-GFP (green) were  
1003 infected with SPA WT expressing mCherry (red). Cells were fixed 7 h p.i. and processed for  
1004 confocal microscopy (A, C) and TEM of ultrathin sections (B, D, E, F, G, H). A) An infected  
1005 cell showing a distinct LAMP1-GFP-positive SIF network was identified and further analyzed  
1006 (MIP). B) TEM overview image of a host cell harboring several salmonellae (red box). Ci, ii,  
1007 iii, Di, ii) For correlation, TEM and CLSM images were superimposed. H) Detail of individual

09.01.2021

Typhoidal *Salmonella* single cell analyses

1008 SPA cells in SCV with single membrane (red arrowhead). **D, F** Overviews showing SIF distal  
1009 to the SCV, regions shown in details are indicated by light or dark blue boxes. **E, G**  
1010 Corresponding detail views of double membrane SIF with inner (black arrowhead) and outer  
1011 (light blue, dark blue arrowheads) membranes. Scale bars: 10  $\mu\text{m}$  (**A**), 7  $\mu\text{m}$  (**B**), 2  $\mu\text{m}$  (**D**), 250  
1012 nm (**E, G**), 3  $\mu\text{m}$  (**F**), 500 nm (**H**).  
1013

09.01.2021

Typhoidal *Salmonella* single cell analyses

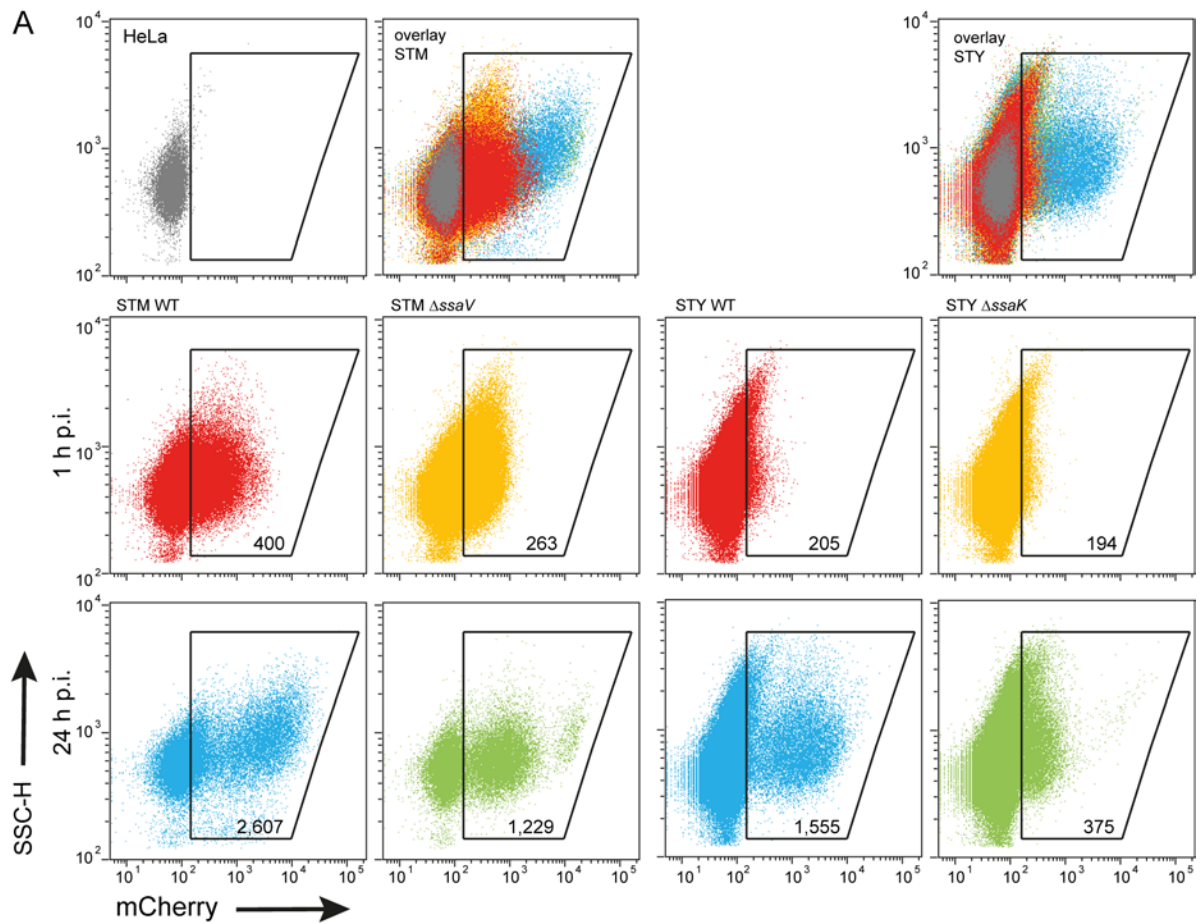

1014  
1015

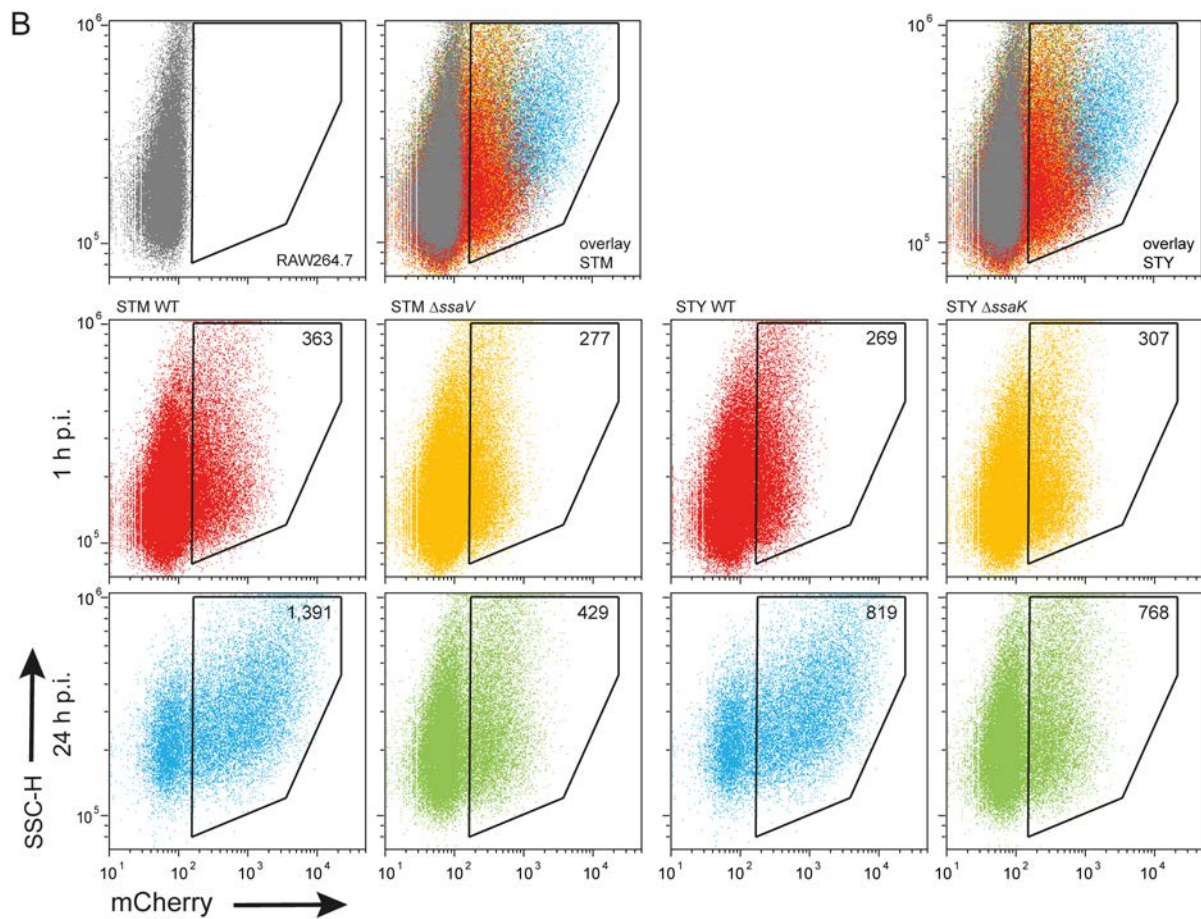

1016



09.01.2021

Typhoidal *Salmonella* single cell analyses

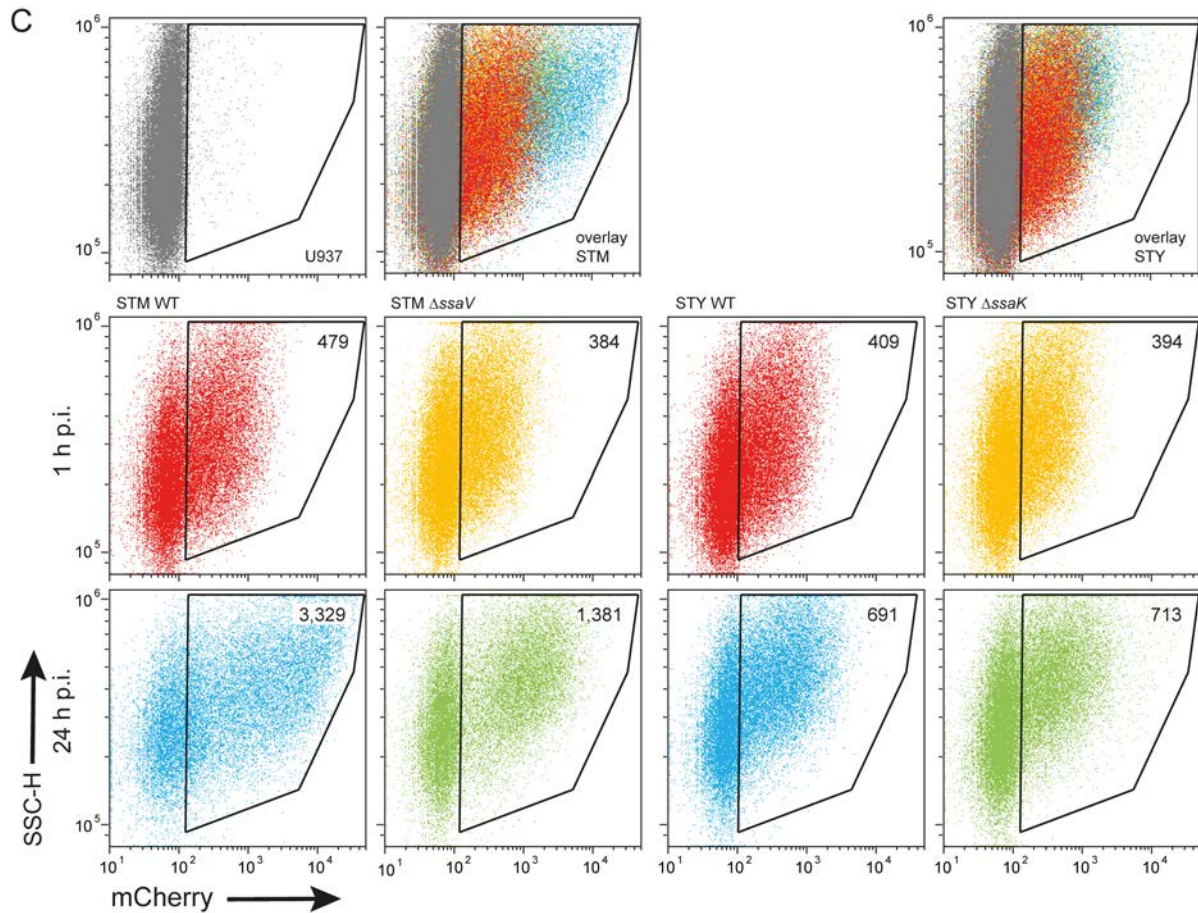

1017

1018 **Fig. S 7. Intracellular proliferation of STM and STY determined by flow cytometry.** The  
1019 single dot plots of the experiment shown in **Fig. 8** are displayed. HeLa cells (A), RAW264.7  
1020 macrophages (B), or U937 macrophages (C) were used as host cells. Gating for infected host  
1021 cells was made using non-infected cells (grey dots) as control. Overlays of dot plots show WT  
1022 *Salmonella* at 1 h or 24 h p.i. in red and blue, respectively, and  $\Delta$ ssaV or  $\Delta$ ssaK *Salmonella* at  
1023 1 h or 24 h p.i. in orange and green, respectively. The X-mean values for mCherry fluorescence  
1024 intensities of infected cells are indicated the gates for infected host cells. Assays were  
1025 performed in three biological replicates, one representative replicate is shown.
